1  
2 **FRONT MATTER**

3  
4 **Title**

- 5 • Myeloid Tribbles 1 induces early atherosclerosis via enhanced foam cell expansion  
6 • Short title: TRIB1 drives foam cell formation via OLR1

7  
8 **Authors**

9  
10 Jessica M Johnston<sup>1</sup>, Adrienn Angyal<sup>1</sup>, Robert C Bauer<sup>2,7</sup>, Stephen Hamby<sup>3</sup>, S Kim  
11 Suvarna<sup>1</sup>, Kajus Baidžajevs<sup>1</sup>, Zoltan Hegedus<sup>4</sup>, T Neil Dear<sup>5</sup>, Martin Turner<sup>6</sup>, The  
12 Cardiogenics Consortium†, Heather L Wilson<sup>1</sup>, Alison H Goodall<sup>3</sup>, Daniel J Rader<sup>7</sup>, Carol  
13 C Shoulders<sup>8\*</sup>, Sheila E Francis<sup>1</sup>, Endre Kiss-Toth<sup>1\*</sup>

14  
15  
16 **Affiliations**

17 <sup>1</sup> Department of Infection, Immunity and Cardiovascular Disease, University of Sheffield,  
18 Beech Hill Road, Sheffield S10 2RX, UK.

19 <sup>2</sup> Division of Cardiology, Dept. of Medicine, Columbia University Medical Center, USA.

20 <sup>3</sup> Department of Cardiovascular Sciences, University of Leicester and NIHR  
21 Cardiovascular Biomedical Research Unit, Glenfield Hospital, Leicester, UK.

22 <sup>4</sup> Institute of Biophysics, Biological Research Centre, Hungarian Academy of Sciences,  
23 Temesvari korut 62, Szeged, H-6726, Hungary and Departments of Biochemistry and Medical  
24 Chemistry, University of Pecs, Medical School, Szigeti ut 12, Pecs, H-7624 Hungary.

25 <sup>5</sup> Division of Biomedical Services, University of Leicester, UK.

26 <sup>6</sup> Laboratory of Lymphocyte Signalling and Development, The Babraham Institute,  
27 Babraham Research Campus, Cambridge, CB22 3AT, UK.

28 <sup>7</sup> Perelman School of Medicine at the University of Pennsylvania and Children's Hospital  
29 of Philadelphia, PA 19104-5158, USA.

30 <sup>8</sup> Centre for Endocrinology, William Harvey Research Institute, Queen Mary University of  
31 London and the Barts and the London School of Medicine and Dentistry, London EC1M 6BQ,  
32 UK.

33 † Membership of the Cardiogenics Consortium appears in the Supplementary Materials.

34 \* Corresponding authors: [c.shoulders@qmul.ac.uk](mailto:c.shoulders@qmul.ac.uk) and [e.kiss-toth@sheffield.ac.uk](mailto:e.kiss-toth@sheffield.ac.uk)

35  
36  
37  
38  
39  
40  
41  
42  
43  
44  
45  
46  
47

## 48 **Abstract**

49  
50 Macrophages drive atherosclerotic plaque progression and rupture, hence attenuating their  
51 atherosclerosis-inducing properties holds promise for reducing coronary heart disease (CHD).  
52 Recent studies in mouse models have demonstrated that Tribbles 1 (*Trib1*) regulates macrophage  
53 phenotype and shows that *Trib1* deficiency increases plasma cholesterol and triglyceride levels,  
54 suggesting that reduced *TRIB1* expression mediates the strong genetic association between the  
55 *TRIB1* locus and increased CHD risk in man. However, we report here that myeloid-specific  
56 *Trib1* (*mTrib1*) deficiency reduces early atheroma formation and that *mTrib1* transgene  
57 expression increases atherogenesis. Mechanistically, *mTrib1* increased macrophage lipid  
58 accumulation and the expression of a critical receptor (OLR1), promoting oxidized low density  
59 lipoprotein uptake and the formation of lipid-laden foam cells. As *TRIB1* and *OLR1* RNA levels  
60 were also strongly correlated in human macrophages, we suggest that a conserved, *TRIB1*-  
61 mediated mechanism drives foam cell formation in atherosclerotic plaque and that inhibiting  
62 *mTRIB1* could be used therapeutically to reduce CHD.

63

64

## 65 **MAIN TEXT**

66

67

### 68 **Introduction**

69

70 Atherosclerosis, a progressive disease of arterial blood vessels and the main underlying cause of  
71 stroke, myocardial infarction and cardiac death (1), is initiated by the conversion of plaque-  
72 macrophages to cholesterol-laden foam cells (2) in the arterial intima (3). In the early-stage  
73 atherosclerotic plaque this transformation is induced by the uptake of both LDL-C and oxidized  
74 (ox)LDL (2, 4), which may serve a beneficial purpose (3); but unrestrained, the crucial function of  
75 plaque-macrophages in resolving local inflammation is compromised and the development of  
76 unstable, advanced lesions ensues (3). Importantly, it has been shown that foamy macrophages are  
77 not only less effective in clearing apoptotic cells (5) they are also more prone to apoptosis (6),  
78 thus increasing secondary necrosis and the release of cellular components and lipids that  
79 ultimately form the necrotic core of advanced plaques. As such, there have been investigations  
80 into the identities of macrophage-specific proteins that induce lipid accumulation. Thus, myeloid-  
81 lipoprotein lipase (LPL), for example, has been shown to enhance the retention of LDL-C and  
82 triglyceride-rich remnant particles within the artery wall (7) and induce foam cell formation (8);  
83 while the scavenger receptor, oxidized low-density lipoprotein receptor 1 (OLR1) has been found  
84 to internalize oxLDL (9), promoting not only lipid accumulation and growth but also the survival



85 of macrophage-foam cells (10). Conversely, myeloid-*ApoE* expression has been shown to  
86 promote HDL-mediated cholesterol efflux (11) and macrophage switching from a pro-  
87 inflammatory (M1) to an alternatively (M2) activated phenotype (12). However, significant  
88 advances in the development of CVD therapeutics await the identification of an apical  
89 regulator(s) that acts in a coordinated manner on the multiple downstream processes governing  
90 lipid accumulation, as well as atherogenicity of plaque-resident macrophages.

91

92 Tribbles-1 has been detected in murine plaque-resident macrophages (13) and variants at the  
93 *TRIB1* locus have been associated with increased risk of hyperlipidemia and atherosclerotic  
94 disease in multiple populations (14–16). However, no study had examined the macrophage-  
95 specific cellular processes dependent on m*Trib1* expression and how these tally with the assumed  
96 athero-protective properties of this pseudokinase. At the whole-body level, one study has shown  
97 that *Trib1* deficient mice have markedly reduced numbers of M2-like (F4/80<sup>+</sup> MR<sup>+</sup>) macrophages  
98 in multiple organs, including adipose tissue (17). As such, these studies strongly implicated that  
99 loss of macrophage-*Trib1* expression within the arterial wall would lead to excessive  
00 atherosclerotic plaque inflammation and/or impair inflammation resolution and promote atheroma  
01 formation. Moreover, in hepatocytes *Trib1* suppresses VLDL production and *de novo* lipogenesis  
02 (16), indicating that the association between variants at the *TRIB1* locus and atherosclerotic  
03 disease (14–16) relates to loss of TRIB1 activity.

04

05 In the current study, we found that contrary to expectations, myeloid-specific knockout of *Trib1* is  
06 athero-protective, while m*Trib1* expression is detrimental. In brief, *Trib1* increased OLR1 RNA  
07 and protein expression, ox-LDL uptake, foamy macrophage formation and atherosclerotic burden  
08 in two distinct mouse models of human disease. The expression of these two genes, as well as  
09 those of *LPL* and *SCARB1* (which mediates selective HDL-cholesterol uptake (18)), are also  
10 tightly linked in human macrophages. Collectively, our studies reveal an unexpected beneficial  
11 effect for selectively silencing *Trib1* in arterial plaque macrophages.

12  
13  
14  
15  
16  
17  
18  
19  
20  
21  
22  
23  
24  
25  
26  
27  
28  
29  
30  
31  
32  
33  
34  
35  
36  
37  
38  
39  
40  
41  
42  
43  
44  
45  
46

## Results

### *Myeloid-Trib1 Increases Atherosclerosis Burden*

Immunostaining of a human coronary atheroma detected Tribbles 1 in the arterial wall, including in macrophages (**Fig 1A**). We therefore examined the impact of macrophage Tribbles 1 expression on atherogenesis by creating mice expressing low, WT and elevated levels of myeloid *Trib1* as outlined in **Fig 1 B – F**. Although previous studies have demonstrated that global *Trib1* KO significantly increases perinatal lethality (17) *Trib1*-floxed mice and myeloid-specific *Trib1* knock-out (*Trib1*<sup>mkO</sup>) mice were fully viable and bred normally (**Fig S1 A-D**). Myeloid-specific *Trib1* transgenic (overexpressing, *Trib1*<sup>mTg</sup>) mice were also fully viable and bred normally. m*Trib1* RNA levels were substantially lower in *Trib1*<sup>mkO</sup> than in floxed WT littermates, as judged by RT-qPCR assays performed on bone marrow-derived macrophages (BMDMs) prepared from these animals (**Fig 1G**). As judged by eGFP expression, the bi-cistronic *Trib1* transgene was expressed in  $78.43 \pm 2.33\%$  and  $65.58 \pm 0.92\%$  of blood monocytes and peritoneal macrophages, respectively (**Fig 1G**) and overall, the transgene increased BMDM *Trib1* RNA levels by  $2.49 \pm 0.43$  (SEM) fold (**Fig 1G**, fourth panel). Consistent with previous findings (19) the transgene was also expressed in neutrophils, which form a minor component of the immune cell population within very early-stage atherosclerotic lesions (20). Thus, we detected eGFP in  $53.88 \pm 2.41\%$  and  $34.93 \pm 2.96\%$  of *Trib1*<sup>mTg</sup> blood and bone marrow CD11b<sup>+</sup>/Ly6C<sup>-</sup>/Ly6G<sup>+</sup> cells, respectively compared to  $25.95 \pm 3.16\%$  and  $12.42 \pm 2.01\%$  in their CD11b<sup>+</sup>/Ly6C<sup>+</sup>/Ly6G<sup>-</sup> monocyte counterparts (**Fig. S1 E - I**). However, in marked contrast to the reported full-body *Trib1* knockout mouse (17), *Trib1*<sup>mkO</sup> mice were not afflicted by reduced numbers of total, or individual, white blood cells (**Fig. 1H**) or by reduced macrophage numbers in their adipose tissue (F4/80<sup>+</sup>, **Fig. S2A**), liver (F4/80<sup>+</sup>, **Fig. S2B**) or spleen (F4/80<sup>+</sup> and CD206<sup>+</sup>, **Fig. S2C**). Similar to *Trib1*<sup>mkO</sup> mice, *Trib1*<sup>mTg</sup> mice displayed no gross abnormalities and had WT numbers of white blood cells (**Fig. 1H**). Additionally, the sizes of their adipocytes (**Fig. S2A**), liver (**Fig. S2B**) and splenic (**Fig. S2C**) macrophage populations were unaltered.

To address the contribution of myeloid *Trib1* in early atherosclerosis, we first transplanted bone marrow cells from the *Trib1*<sup>mkO</sup> and *Trib1*<sup>mTg</sup> mice and their respective controls (i.e. non-CRE, floxed KO and Tg alleles) into 12-13 weeks old lethally-irradiated male *ApoE*<sup>-/-</sup> mice (**Fig 2A**). Thus, all recipient mice received *ApoE*<sup>+/+</sup>-bone marrow cells to mitigate the previously described effects of total ablation of this apolipoprotein on both classical/proinflammatory (M1) and

47 alternative/anti-inflammatory (M2) polarization (12) and, to provide them with a physiologically  
48 important source of ApoE to aid normalisation of plasma cholesterol levels and of the lipoprotein  
49 profile in this otherwise extreme hyperlipidaemic mouse model of human atherosclerosis (12, 21).  
50 Following a seven-week recovery period, the chimeric mice were fed a Western diet containing  
51 0.2% cholesterol for 12 weeks. At sacrifice, and consistent with expectations of the study design,  
52 the chimeric mice had relatively low plasma cholesterol levels for a mouse model of human  
53 atherosclerosis (**Fig S3A**).

54  
55 Unexpectedly, we found less atherosclerosis in the thoracic aorta of  $Trib1^{mKO} \rightarrow ApoE^{-/-}$  chimeras  
56 than in the control WT mice (**Fig. 2B, Fig. S4A**). Conversely, there was a significantly higher  
57 atheroma burden in the  $Trib1^{mTg} \rightarrow ApoE^{-/-}$  mice (**Fig. 2B, Fig S4A**). Similarly, the lesions in the  
58 aortic sinus were on average smaller in the  $Trib1^{mKO} \rightarrow ApoE^{-/-}$  mice and larger in the  
59  $Trib1^{mTg} \rightarrow ApoE^{-/-}$  mice (**Fig. 2C, Fig. S4B**). However, the collagen contents of the  
60  $Trib1^{mKO} \rightarrow ApoE^{-/-}$  and  $Trib1^{mTg} \rightarrow ApoE^{-/-}$  in these “early-stage” plaques and their clinical  
61 pathology were comparable to those of the chimeric  $Trib1^{mWT} \rightarrow ApoE^{-/-}$  mice (**Fig. S4C**). In short,  
62 we found that *mTrib1* expression increased the atherosclerotic burden of  $ApoE^{-/-}$  mice, despite  
63 having little impact on plasma LDL-cholesterol levels (**Fig S3A**).

64  
65 To confirm that *mTrib1* accelerates the development of atherosclerosis (**Fig. 2B, C**) we created an  
66 LDL-receptor (*Ldlr*) knock-down model of human atherosclerosis (22) to induce hyperlipidaemia  
67 and atherosclerosis in otherwise WT mice (22). Specifically, mice were injected with an adeno-  
68 associated virus (rAAV8) encoding for proprotein convertase subtilisin/kexin 9 (**Fig. 2D**), which  
69 previous studies have shown lowers both hepatic and extrahepatic surface cell expression of the  
70 *Ldlr* (23). Following feeding a Western Diet for 12 weeks, this intervention produced comparable,  
71 highly significant reductions in LDLR protein levels in the  $Trib1^{mTg}$  and  $Trib1^{mWT}$  mice (**Fig. 2E**)  
72 and a similar degree of hyperlipidaemia (**Fig. S3B**). However, despite this and consistent with  
73 *mTrib1* expression increasing atheroma formation in  $ApoE^{-/-}$  mice,  $Trib1^{mTg}$  injected with  
74 rAAV8-Pcsk9 developed a significantly higher atherosclerotic burden in their aorta and aortic  
75 sinus than their similarly injected  $Trib1^{mWT}$  mice (**Fig. 2F-G**)

### 76 77 ***Myeloid-Trib1 Increases Macrophage/Foam Cell Size in the Atherosclerotic Plaque***

78 Next, we investigated the macrophage content and phenotype in the atherosclerotic plaque in each  
79 mouse models. This revealed that the aortic sinus lesions of  $Trib1^{mKO} \rightarrow ApoE^{-/-}$  mice contained a  
80 much smaller MAC3<sup>+</sup> immuno-reactive area than the chimeric  $Trib1^{mWT} \rightarrow ApoE^{-/-}$  mice, while on

81 average the  $Trib1^{mTg} \rightarrow ApoE^{-/-}$  atheromas contained a marginally larger stained area (**Fig. 3A, B**).  
82 However, there was no preferential loss of  $YM1^{+}$  macrophages in the  $Trib1^{mKO} \rightarrow ApoE^{-/-}$  lesions  
83 (**Fig. 3B**), consistent with the finding that M2 polarization of  $Trib1$ -deficient BMDMs isolated  
84 from whole-body  $Trib1^{mKO}$  mice are compromised to a similar extent as M1 polarization (24).  
85 Additionally, we could not attribute the pro-atherogenic activity of myeloid  $Trib1$  expression to a  
86 preferential increase in the pro-inflammatory macrophage ( $NOS2^{+}$ ) content of  $Trib1^{mTg} \rightarrow ApoE^{-/-}$   
87 plaque (**Fig. 3B, panel 3**). Rather, the increased atherosclerosis in the  $Trib1^{mTg} \rightarrow ApoE^{-/-}$  chimeras  
88 was attributable to a doubling of foam cell numbers (cells with characteristic foamy appearance  
89 and  $MAC3^{+}$  (**Fig S4D**)), and on average, these cells were also larger (**Fig. 3A, C, Fig S4D**).  
90 Likewise, there was no difference in the sizes of the macrophage populations in the  $Trib1^{mTg}$ -  
91  $Pcsk9$  and  $Trib1^{mWT}$ - $Pcsk9$  mice atheromas (**Fig. 3D**) and despite the increased atherosclerotic  
92 burden in the transgenic animals (**Fig. 2F, G**), the atherosclerotic lesions of the  $Pcsk9$ - $Trib1^{mTg}$   
93 mice contained larger foam cells (**Fig. 3D**).

94  
95 In the  $Trib1^{mTg} \rightarrow ApoE^{-/-}$  chimeras, there was a stronger correlation between the mean foam cell  
96 size and the percentage of aortic sinus stained by  $MAC3$  than between  $MAC3^{+}$  staining and foam  
97 cell numbers (**Fig. 3E**) and, we could not ascribe the observed increase in plaque-foam cell  
98 numbers on the effects of  $mTrib1$  expression on blood cholesterol levels (**Fig 3E**), HDL-C levels  
99 or the non-significant rise in LDL-C (**Fig. S3**). In fact, while the  $Trib1^{mWT} \rightarrow ApoE^{-/-}$  chimeras with  
00 the highest plasma cholesterol, HDL-C and LDL-C concentrations had the lowest amount of  
01  $MAC3^{+}$  staining in their aortic sinus lesions, the inverse was true for the  $Trib1^{mTg} \rightarrow ApoE^{-/-}$   
02 chimeras (**Fig. 3E, third panel; Fig. S3**). Thus, collectively, these data indicate that increased  
03 macrophage lipid uptake/storage was the prominent driving force for the observed foam cell  
04 expansion besetting the early-stage of the atherosclerotic process in these and the  $Trib1^{mTg}$ - $Pcsk9$   
05 mice.

### 07 ***Myeloid-TRIB1 Expression Induces OLR1 Expression in Both Mouse and Man.***

08 To identify potential cellular mechanisms by which  $mTrib1$  enhances foam cell expansion, we  
09 analysed the gene expression characteristics of human  $TRIB1^{High}$  monocytes and  $TRIB1^{High}$   
10 monocyte derived macrophages (MDM) using the microarray RNA data produced in the  
11 Cardiogenics Transcriptomic Study (25). In this dataset, involving samples from 758 individuals,  
12  $TRIB1$  RNA levels were on average higher in monocytes than in MDMs (**Fig. 4A, top panel**) but,  
13 as is evident from the analyses of RNA levels in 596 paired samples, there was no correlation  
14 between  $TRIB1$  RNA levels in these two cell types (**Fig. 4A, bottom panel**). Moreover, genes

15 differentially expressed in *TRIB1*<sup>High</sup> versus *TRIB1*<sup>Low</sup> monocytes were enriched for different sets  
16 of ‘DAVID’ Gene Ontology cluster terms (**Tables S1, S2**) than those characterising the more  
17 lipid-based transcriptome of *TRIB1*<sup>High</sup> MDM (**Fig 4B, C, Tables S3**).

18  
19 The Cardiogenics Transcriptomic data strongly suggested that the m*TRIB1*-induced foam cell  
20 phenotype stemmed from increased oxLDL uptake rather changes in LDLR and scavenger  
21 receptor class B type 1 (which mediates selective HDL-cholesterol uptake and efferocytosis (18))  
22 expression (**Fig 4C**) or reductions in ABCG1- and ABCA1-mediated cholesterol efflux (**Fig 4B**).  
23 Notably, *OLR1* was the fourth most differentially expressed gene in the *TRIB1*<sup>High</sup> human MDMs  
24 and the most highly altered scavenger receptor in these cells (**Fig 4C**). We therefore examined the  
25 effect of m*Trib1* transgene expression on this oxLDL receptor. This revealed that *Trib1*<sup>mTg</sup>  
26 BMDMs contained more *Olr1* RNA but fewer *Scarb1* transcripts (**Fig 4D**) than their *Trib1*<sup>mWT</sup>  
27 counterparts, indicating that the increased numbers of *OLR1* and reduced numbers of *SCARB1*  
28 transcripts in human *TRIB1*<sup>High</sup> MDMs are causally related to the increased number of *TRIB1*  
29 transcripts in these cells. The reciprocal relationship between *OLR1* and *SCARB1* RNA levels in  
30 *TRIB1*<sup>High</sup> MDMs was also recapitulated in IFN $\gamma$ /LPS, IL4- (**Fig. S5A**) and fatty acid-polarised  
31 MDM samples but not in HDL-polarized MDMs (**Fig. S5B, Table S6**). Rather HDL-polarised  
32 MDMs contained *OLR1* and *SCARB1* RNA levels indistinguishable from those of non-polarized  
33 MDMs (**Fig S5A, B, Table S6**) Finally, to substantiate the evidence for causal *TRIB1*  
34 involvement in *OLR1* expression we stained BMDMs for *OLR1* protein. *OLR1* was detected in  
35 twice as many *Trib1*<sup>mTg</sup> cells than their wild-type counterparts (**Fig. 4E**), consistent with the  
36 Western Blotting analysis of whole BMDM cell lysates (**Fig. 4F**).

### 37 38 **m*Trib1*-Induced *OLR1* Expression in Plaque Macrophages Increases Atherosclerotic** 39 **Burden**

40 To corroborate the evidence for causal m*OLR1* involvement in plaque-resident macrophage foam  
41 cells expansion, we quantified *OLR1* expression in the aortic sinus lesions of our mouse models  
42 using an *OLR1*-antibody that recognizes the cell-surface expressed form of this oxLDL receptor,  
43 as well as the proteolytically cleaved (soluble) extracellular form (9). The antibody detected  
44 *OLR1* in MAC3+ cells and in acellular areas of the mouse aortic sinus lesions, including in  
45 regions adjacent to plaque-macrophages (**Fig 5A**). Moreover, as expected from the known  
46 expression and regulation of this scavenger receptor in endothelial cells (9), significant amounts  
47 of *OLR1* was also detected in the non-macrophage (i.e. MAC3-) cell population at the plaque  
48 surface of the more hyperlipidemic model of human atherosclerosis (**Fig S3, Fig 5A**). Finally,

49 confirming the causal involvement of mTRIB1 in mOLR1 expression (**Fig. 4D-F**), the anti-OLR1  
50 antibody detected OLR1 in more of the plaque macrophages of *Trib1*<sup>mTg</sup>→*ApoE*<sup>-/-</sup> mice than in  
51 those of the *Trib1*<sup>mWT</sup>→*ApoE*<sup>-/-</sup> control animals ( $33.89 \pm 6.56\%$  vs.  $16.18 \pm 4.05\%$ ); a result  
52 which was replicated in the *Trib1*<sup>mTg</sup>-*Pcsk9* and *Trib1*<sup>mWT</sup>-*Pcsk9* mice ( $29.35 \pm 7.42\%$  vs.  $10.38 \pm$   
53  $3.36\%$ ) (**Fig 5A**).

54

55 To mechanistically validate the contribution of *mTrib1*-induced *Olr1* expression to foam cell  
56 expansion, we incubated non-polarised BMDMs with oxLDL for 24 h. This led to marked rises in  
57 the intracellular levels of both total cholesterol ( $2.71 \pm 0.24$ -fold,  $P=0.0091$ ) and unesterified  
58 cholesterol ( $5.81 \pm 0.83$ -fold,  $P=0.0049$ ) in the *Trib1*<sup>mTg</sup> BMDMs but not in their WT-  
59 counterparts (**Fig. 5B**). Additionally, as judged by Oil Red O staining, oxLDL transformed nearly  
60 three times as many *Trib1*<sup>mTg</sup> BMDMs into foam cells than *Trib1*<sup>mWT</sup> cells (**Fig. 5C**,  $P < 0.0001$ ),  
61 as evidenced by the very visible increase in neutral lipid accumulation in these cells upon  
62 exposure to oxLDL. In contrast to the profound effects of oxLDL on cholesterol accumulation in  
63 un-polarised *Trib1*<sup>mTg</sup> BMDMs, we observed no impairment of HDL-mediated cholesterol efflux  
64 (**Fig. 5D**), consistent with the observation that neither *Abcal* nor *Abcg1* RNA levels are reduced  
65 in these BMDMs (**Fig 5D**) and, that the *Trib1*<sup>mTg</sup>→*ApoE*<sup>-/-</sup> chimeras have higher, rather than  
66 lower, HDL-C levels than their wild-type peers (**Fig S3**). Thus, collectively, our results suggest  
67 that *Trib1*-induced foam cell expansion in early-stage atherosclerotic plaque arises from increased  
68 cholesterol/neutral lipid uptake and retention rather than reduced HDL-mediated cholesterol  
69 efflux.

70

## 71 **Discussion**

72

73 Despite the success in establishing that hepatic *Trib1* expression affects the regulation of multiple  
74 cellular processes modulating blood cholesterol and triglyceride levels (16), the influence of  
75 global-knockout of *Trib1* on shaping the phenotype of macrophages (17), and the finding that  
76 variants at the *TRIB1* locus are associated with and increased CHD risk (14, 15), the contribution  
77 of Tribbles-1 on atherogenesis remains to be addressed. Herein, we demonstrate that there is a  
78 wide distribution of *TRIB1* RNA levels in human MDMs and, that genetically engineered changes  
79 in *mTrib1* expression in mouse models of early-stage human atherosclerosis markedly affect the  
80 size of developing plaques and the morphological and functional properties of plaque-  
81 macrophages (**Fig. 6**). In summary, we have confirmed the pro-atherogenic impact of myeloid  
82 TRIB1 in two distinct *in vivo* models of human atherosclerosis.



83

84 Recent studies have established that oxLDL accumulates steadily in both early- (growing) and  
85 mature- (yellow plaque without a necrotic core) stage human coronary plaques but that in more  
86 advanced vulnerable plaques (yellow plaques with a necrotic core) this lipoprotein is removed  
87 either by metabolism or replacement with other substances, including cell debris (2). This *in vivo*  
88 data dovetails well with the early *in vitro* work which showed that while oxLDL promotes  
89 macrophage growth and survival in a dose-dependent manner, beyond a certain lipid  
90 concentration cell death ensues, albeit by an unknown mechanism (10). Thus, a critical question  
91 to consider is whether m*TRIB1*-induced OLR1 expression serves an (athero-) protective role in  
92 the early stage of human atherosclerosis, for example, by reducing the exposure of plaque-  
93 resident vascular cells (where this disease is initiated) to oxLDL. This lipoprotein is a well-  
94 described activator of endothelial cell OLR1 expression with the totality of the data indicating  
95 that this activation culminates in arterial endothelium dysfunction (9). In the experiments reported  
96 here we provide evidence that, m*Trib1* transgene expression reduces vascular cell exposure to  
97 oxLDL given that it increased the size and lipid contents of plaque-resident foam cells in two  
98 independent models of early-stage atherosclerosis by increasing mOLR1 expression and oxLDL  
99 uptake. Notably, in the less hyperlipidaemic of these two transgenic models, we also could  
00 discern a very strong positive correlation between plaque-macrophage numbers and plasma  
01 cholesterol/LDL-C levels, implying that in early-stage atherosclerosis m*Trib1*<sup>High</sup> macrophages  
02 (in marked contrast to *Trib1*-deficient macrophages) are uniquely equipped to increase plaque-  
03 macrophage numbers in response to lipid excess.

04

05 Based on the strong evidence of a causal link between hyperlipidaemia and CHD (26) and, the  
06 demonstration that ablating hepatic *TRIB1* expression increased plasma levels of cholesterol,  
07 LDL-C and of triglyceride (16), the implication was, which seemed entirely consistent with  
08 GWAS results (14, 15) that increasing *TRIB1* would be athero-protective. Silencing *TRIB1*  
09 expression in macrophages, however, turns out to be athero-protective, as judged by analyses of  
10 the aortas and aortic sinuses from *Trib1*<sup>mKO</sup>→*ApoE*<sup>-/-</sup> chimeric mice, after a 12 weeks Western  
11 dietary regime. This counter-intuitive result, which fits well with our *in vitro* and *in vivo* analysis  
12 of the consequences of m*Trib1*<sup>High</sup> expression on foam cell expansion, suggests moving forward  
13 that developing a therapy to specifically silence *Trib1* expression in macrophages would provide  
14 clinical benefit beyond that of lipid-lowering medications, although full realization of this benefit  
15 may require its adoption at an early-stage of atherogenesis. More generally, our study also  
16 demonstrates that mechanistic probing of GWAS signals is not only warranted, but critical, to



17 identify both the totality and directionality of disease risk factors, even when, as was the case for  
18 *TRIB1*, the association between a genetic variant(s), disease risk and a major disease-risk factor  
19 (plasma lipids) appeared congruent. Hence, we acknowledge that a limitation of the current study  
20 is that we have not addressed whether changes in vascular cell *TRIB1* expression might affect  
21 early-stage atherosclerosis development and, whether the GWAS-CHD signal at the *TRIB1* locus  
22 reflects that in these cells (and hepatocytes) *TRIB1* serves an athero-protective role, in contrast to  
23 the situation in plaque-resident macrophages where it induces foam cell expansion.

24  
25 One of the most striking outcomes arising from roughly doubling *Trib1* expression in  
26 macrophages was the increase in foam cell size that developed in both of our models of human  
27 atherosclerosis. Our results indicate that this was driven by the failure of these cells to increase  
28 HDL-mediated cholesterol efflux in response to an up-regulation of cholesterol and fatty acid  
29 uptake. Additionally, this up-regulation was attributable to increased *OLR1* RNA and protein  
30 expression, consistent with the *in vitro* studies of Lazar and coworkers (27) which demonstrated  
31 that Rosiglitazone-induction of *Olr1* expression in adipocytes increased oxLDL and palmitate  
32 uptake and cellular cholesterol levels. Likewise, when Steinbrecher and colleagues (28) increased  
33 macrophage *OLR1* expression via lysophosphatidylcholine stimulation, oxLDL uptake was also  
34 induced, prompting them to introduce the concept that macrophages within atheromas may be  
35 quiescent with respect to oxLDL uptake until *Olr1* expression is induced (28). Here, we validate  
36 this concept by demonstrating overexpressing *mTrib1*-led directly to an increase in *OLR1* protein  
37 in plaque-resident macrophages, alongside their increased lipid contents and size. Our data also  
38 show that by doubling *mTrib1* expression, we removed the requirement for an external stimulus  
39 to up-regulate *OLR1* expression and the consequent clinical sequelae. In fact, the phenotype  
40 observed in response to this rise in *mTrib1* expression fits well with earlier computational  
41 modelling studies that indicated that relatively modest changes in *TRIB1* would have a major  
42 impact on the activity of MAPK pathways, thus defining the concentration of these proteins is  
43 critical for shaping cell function (29).

44  
45 Thus, from the therapeutic standpoint our results reveal that targeting *TRIB1* expression could, in  
46 addition to beneficially affecting *OLR1* expression, moderate CHD pathogenesis by  
47 simultaneously altering in favourable directions the expression of a number of other disease-  
48 promoting genes affected by changes in *TRIB1* expression. These would include, for example,  
49 beneficially increasing *NCEH1* expression to reduce the release of pro-inflammatory cytokines  
50 from plaque-resident macrophages (30), while reducing the expression of *LPL* to help reduce the

51 retention of LDL in the artery wall during early-stage atherosclerosis (7), as well as excessive  
52 accumulation of cholesteryl ester and triglycerides within macrophage foam cells (8). Whether  
53 mTRIB1 modulates atheroma regression (31, 32) and late-stage atherosclerotic plaque stability by  
54 orchestrating a coordinated response to the lipid and inflammatory challenges encountered by  
55 plaque-resident macrophages/foam cells in advanced stage atherosclerosis now requires  
56 investigation.

57  
58  
59  
60

## Materials and Methods

### Human samples

62 Human tissue and blood samples were collected under protocols approved by the University of  
63 Sheffield Research Ethics Committee and Sheffield Teaching Hospitals Trust Review Board (Ref.  
64 STH 16346, SMBRER310) and in accordance with the Declaration of Helsinki. All participants  
65 gave written informed consent. Human coronary arteries obtained from explanted hearts were  
66 fixed in 10% (v/v) formalin and embedded in paraffin wax. Antigen retrieval was performed with  
67 trypsin for 15 mins at RT (#MP-955-K6, A Menarini Diagnostics, UK). Sections were incubated  
68 with mouse anti-human CD68 (#M0814, Clone KP1, Dako) antibody (1:100 dilution) and rabbit-  
69 anti-human TRIB1 (#09-126, Millipore, UK) antibody (1:100) and the appropriate secondary  
70 antibodies, biotinylated horse anti-mouse secondary antibody and goat anti-rabbit secondary  
71 (#BA-2000, #BA-1000, Vector Laboratories) antibody (both 1:200 dilution); and the detection  
72 reagents, Elite Mouse ABC HRP (#PK-6100, Vector Laboratories), 3, 3'-Diaminobenzidine  
73 (SIGMAFAST<sup>TM</sup>, D4293, Sigma), rabbit ABC-Alkaline phosphatase and Vector Red Alkaline  
74 phosphatase substrate kit (AK-5000, #SK-5100, Vector laboratories). Sections were  
75 counterstained with haematoxylin and mounted with DPX mountant (#44581, Sigma-Aldrich).

76

### Mice and creation of murine models of myeloid-specific *Trib1* expression.

78 Mice were handled in accordance with UK legislation (1986) Animals (Scientific Procedures)  
79 Act. Mouse experiments were approved by the University of Sheffield Project Review Committee  
80 and carried out under a UK Home Office Project Licence (70/7992). All mice used were congenic  
81 on a C57BL/6J background (N17) and were housed in a controlled environment with a 12-hour  
82 light/dark cycle, at 22°C in Optimice individually ventilated cages (Animal Care Systems) and  
83 given free access to a standard chow diet (#2918; Harlan Teklad) and water. A KOMP repository  
84 embryonic stem (ES) cell clone containing loxP sites flanking exon 2 of *Trib1* (EPD0099\_5\_D04)  
85 was used to generate a floxed *Trib1* allele. The clone was genotyped to validate its authenticity,

86 injected into C57BL/6J blastocysts and transferred to pseudo-pregnant recipient females (Geneta).  
87 Resulting chimeras were mated with a FLP-deleter strain maintained on a C57BL/6J background  
88 (Geneta) and floxed-*Trib1* mice generated. *Trib1*<sup>mkO</sup> mice were generated by crossing floxed-  
89 mice with Lys2-cre-recombinase transgenic mice (<https://www.jax.org/strain/004781>), excising  
90 all but the first 120 amino acids of TRIB1. Murine *Trib1* cDNA was introduced into the  
91 previously described, pROSA26, loxP-flanked STOP and Frt-flanked IRES-eGFP targeting  
92 construct (33) and then inserted into the ubiquitously expressed *Rosa26* locus of Bruce4  
93 (C57BL/6 origin) mouse ES cells by homologous recombination. Correct integration was  
94 confirmed by Southern blotting. *Trib1*<sup>1mTg</sup> mice were generated by crossing floxed mice with the  
95 Lys2-cre recombinase transgenic mice described above. Mice were genotyped by PCR  
96 amplification of ear-clip samples. *Trib1 fl/fl* x *Lyz2Cre* and *Rosa26.Trib1* x *Lyz2Cre* were  
97 genotyped for the presence of *Lyz2Cre* and for either *Trib1 fl/fl* or *Rosa26.Trib1* using three  
98 primer sets (**Table S4**). For the atherosclerosis experiments mice were fed a Western (21% fat,  
99 0.2% cholesterol) diet (829100; Special Diet Services, Braitree, UK) for 12 weeks.

00  
01 *mTrib1 RNA quantification*. Bone marrow derived macrophages (BMDM) were cultured for five  
02 days in complete medium: DMEM (BE12-604F, Lonza) medium containing 10% (v/v) L929-  
03 conditioned medium, 10% (v/v) ultra-low endotoxin FBS (S1860-500, BioWest, USA) and 100  
04 U/ml Penicillin and 100ng/ml Streptomycin (15140-122, Gibco). Total RNA was isolated using  
05 ReliaPrep™ kit (#Z6011, Promega) and reverse transcribed into cDNA using iScript cDNA  
06 synthesis kit (#1708890, Bio-Rad). *Trib1* was quantified using the TaqMan® assay  
07 Mm00454875, which amplifies a 99-nucleotide amplicon comprising exon 2 and 3 sequences.

08 *mGFP quantification*. GFP positive cells in freshly purified peripheral blood monocytes were  
09 isolated by positive selection using magnetic MicroBeads conjugated with F4/80 (#130-110-443,  
10 Miltenyi Biotec) and CD115 (#130-096-354, Miltenyi Biotec) using a modified version of the  
11 protocol described by Houthuys *et al* (34). Inflammation was induced by injecting PBS  
12 containing thioglycollate into the peritoneal cavity and isolating the infiltrating cells, as described  
13 (35). The percentages of GFP-positive cells in blood and bone marrow cells (from femurs and  
14 tibiae) were determined using mice sacrificed humanely by cervical dislocation. Red blood cells  
15 were lysed using RBC lysis buffer (eBioscience, 00-4300-54). Approximately 10<sup>6</sup> cells/sample  
16 were re-suspended in PBS and dead cells removed using amine-reactive dye NIR Zombie (1:500  
17 dilution in the antibody master mix; #423105, BioLegend). Live cells were stained with the  
18 following cell surface marker specific antibodies, at 0.1 µg/ml each in 100 µl total volume: AF647-  
19 conjugated anti-human/mouse CD11b (#101220, BioLegend), PE-conjugated anti-mouse Ly6C

20 (#101220, BioLegend) and PE/Cy7-conjugated anti-mouse Ly6G (#127617, BioLegend). Cells  
21 were sorted on an LSR II Cytometer (BD Bioscience) equipped with 355nm, 405nm, 488nm and  
22 633nm excitation lasers. Quantifications were performed with FlowJo software.

23 *Blood Counts.* Blood counts of heparinized blood, obtained via cardiac puncture, were determined  
24 using a Sysmex KX-21N quantitative automated haematology analyser.

25 *Histological analysis.* Adipose tissue and liver samples were paraffin-embedded. Cross-sections  
26 were stained with Haemotoxylin and Eosin or incubated with F4/80 (1:50; #565409 (Clone T45-  
27 2342), BD Pharmingen), followed by biotinylated rabbit anti-rat antibody (1:200, Vector  
28 Laboratories, UK) and PE-Streptavidin (1:20, #405203, Biolegend). They were counterstained  
29 with DAPI (#P36931, Invitrogen) and mounted with ProLong® Gold anti-fade mountant. Mean  
30 adipocyte sizes were determined using NIS-Elements software (Nikon Instruments, UK) by  
31 measuring at least 15 cells per field of view and, three fields of view per mouse. Frozen spleen  
32 sections were stained with F4/80 (PE-rat anti-mouse #123019 (Clone BM8, BioLegend) or  
33 CD206- (Alexa Fluor-647 rat anti-mouse #321116 (Clone 15-2, BioLegend) conjugated  
34 antibodies (1:200), counterstained with DAPI and mounted with Aquamount (Thermo Fisher  
35 Scientific). Fluorescent images were captured using an inverted wide-field fluorescence  
36 microscope (Leica AF6000).

37

### 38 **Models of early-stage human atherosclerosis**

39 For the bone marrow transplantation model, 12-13 week old mixed gender donor mice were  
40 sacrificed humanely by cervical dislocation. Femur/tibae bone marrow cells were isolated and  
41 purified by standard methods and re-suspended in Hank's buffered salt solution (HBSS, without  
42 phenol red, #14175053, ThermoFisher) containing 10% (v/v) foetal calf serum. Donor cells ( $2-4$   
43  $\times 10^6$ ) were transplanted via tail-vein injection to randomly allocated 12-13 week old male *ApoE*<sup>-/-</sup>  
44 recipient mice who were lethally irradiated with 11 Grays in two doses (5.5 Gy on two occasions  
45 separated by 4 hours) on the day of the transplantation. Bone marrow transplant experiments were  
46 undertaken in two waves, one for each *mTrib1* model and respective WT control. During the  
47 seven weeks post-transplant recovery period, the chimeras were fed a standard chow (#2918;  
48 Harlan Teklad) diet and then switched to Western diet (21% fat, 0.2% cholesterol, 829100;  
49 Special Diet Services, Braintree, UK) for 12 weeks. Chimera mice were given sterile acidified  
50 drinking water (1.1% (v/v) HCl) until the end of the procedure.

51 *PCSK9 model.* An adeno-associated virus-based vector (rAAV8) that supports transport of the  
52 *mPCSK9*<sup>D377Y</sup> gene to the liver was purchased from UNC GTC Vector Core (Chapel Hill, NC).  
53 The mice received  $6.1 \times 10^{11}$  viral particles via a single tail vein injection. Following 7 days

54 recovery, they were transferred to the Western diet (829100, Special Diet from Baintree, UK) for  
55 12 weeks.

56 *Lipid measurements.* Fasting, plasma total cholesterol, HDL-C, triglycerides and glucose levels  
57 were measured on a Roche Cobas 8000 modular analyser. LDL-C was estimated by the  
58 Friedewald equation. Additionally, colorimetric assays (Cholesterol Quantification kit,  
59 #MAK043, Sigma Aldrich; Triglyceride Assay kit, #ab65336, Abcam) were used.

60

### 61 **Atherosclerotic Plaque Assessment**

62 Mice were perfused through the heart with PBS and then with 10% (w/v) neutral buffered  
63 formalin. The aorta was segmented at the diaphragm and at the top of the aortic arch. Following  
64 careful removal of surrounding extraneous fat and connective tissue, it was dissected  
65 longitudinally and fixed in 4% (w/v) paraformaldehyde. Dissected aortas were stained with Oil  
66 Red O (60% (v/v) in isopropanol) and pinned onto wax. Images were taken with a macroscopic  
67 CCD camera and analysed by computer-assisted image analysis (NIS-Elements software, Nikon  
68 Instruments, UK). Aortic sinus samples were obtained by excising the heart and transecting  
69 parallel to the atria. Following fixation in 10% formalin (v/v) buffered saline for at least 24 hours,  
70 samples were serially cut (at 7µm intervals) from the valve leaflets until the beginning of the  
71 aorta.

72 *Immunohistochemistry.* Aortic sinus sections were dewaxed and rehydrated. Heat-mediated  
73 antigen retrieval was performed with 10mM sodium citrate and non-specific staining reduced by  
74 incubation in 5% (v/v) goat serum (#G9023, Sigma Aldrich) for 30 mins at RT. Primary  
75 antibodies diluted as appropriate were: the rat anti-mouse MAC-3 antibody Clone M3/84 (1:100  
76 dilution, BD Pharmingen), rabbit polyclonal NOS2 antibody (#ab15323; Abcam, UK 1:100),  
77 rabbit anti-mouse YM1 polyclonal antibody (#ab93034; Abcam, UK 1:100) and or rabbit  
78 polyclonal OLR1 (#ab203246; Abcam, UK, 1:100). The secondary antibodies were biotinylated  
79 rabbit anti-rat secondary antibody (1:200, Vector Laboratories BA-4000), goat anti-rat  
80 DyLight®488 goat anti-rat DyLight®488 (#GtxRt-003488NHSX, ImmunoReagents Inc.) and  
81 goat anti-rabbit DyLight®550 (#GtxRb-003-D550NHSX, ImmunoReagents Inc.). Rabbit anti-rat  
82 conjugated biotinylated antibody was visualised with the Vectastain ABC-HRP complex (PK-  
83 6100, Vector Laboratories). Sections were counterstained with Carazzi's haematoxylin. The  
84 number and area of foam cells (MAC-3<sup>+</sup> macrophages containing a vacuolated cytoplasm) were  
85 quantified using NIS-Elements software (Nikon, UK). Fluorescent images were captured using  
86 an inverted wide-field fluorescence microscope (Leica AF6000). Quantification of YM1, NOS2  
87 and OLR1 in the aortic sinus lesions were confined to macrophage (MAC3<sup>+</sup>) cells only and

88 analysed using ImageJ.

89 *Clinical Grading*. The atherosclerotic burden of the atheroma in aortic sinus samples was graded  
90 according to the Sary system (e.g. 1 = presence of macrophage foam cells, 2 = presence of  
91 intracellular lipid accumulation, 3= presence of extracellular lipid pools) (36) using a light  
92 microscope (Zeiss Axiophot, Carl Zeiss, Jena, Germany) and Imageaccess<sup>©</sup>. Slides were  
93 randomized and the cardiac pathologist was fully blinded to sample origin.

94

### 95 **Western blotting**

96 Twenty microgram ( $\mu\text{g}$ ) of total protein lysates were size-fractionated on 4-12% NuPAGE Bis-  
97 Tris gel (#NP0321, Invitrogen). OLR1 was detected by incubation with a rabbit anti-mouse OLR1  
98 antibody (1:500, #ab203246; Abcam), followed by HRP conjugated goat-anti-rabbit IgG (#P0448,  
99 Dako (1:1000). LDLR was detected by incubation with a rabbit polyclonal antibody (1:1000,  
00 #3839-100, BioVision, USA) 4°C overnight followed by HRP conjugated goat-anti-rabbit IgG  
01 (#P0448, Dako (1:1000).  $\alpha$ -Tubulin was used as a housekeeping control (#sc-32293, Santa Cruz).  
02 Detection of immuno-reactive products was performed using 1:1 ECL reagent (#RPN2235, GE  
03 Healthcare) and a C-DiGit<sup>®</sup> Blot scanner (Model 3600, LI-COR). Densitometry was performed  
04 with Image Studio<sup>™</sup> Lite software (LI-COR).

05

### 06 **Gene expression studies.**

07 RNA from BMDM was prepared as described above. RT-qPCR was performed using primer  
08 sequences provided in **Table S5** and either SYBR-Green (PrecisionPLUS, Primer Design, UK) or  
09 a Taqman (Invitrogen) assay (*TRIB1*, Hs00921832; *OLR1* Hs01552593; *SCARB1*, Hs00969821,  
10 ThermoFisher). Values were normalised to either *Actb* (Mm02619580, Invitrogen) for mouse  
11 samples or *GAPDH* for human samples (Hs02786624), Invitrogen). Fold changes were calculated  
12 using the  $\Delta\Delta\text{Ct}$  method.

13 *Microarray analyses*. Details of the Cardiogenics Transcriptomic Study (CTS), which comprises  
14 transcriptomic data from isolated monocytes from 758 donors and matched monocyte derived  
15 macrophage (MDM) samples from 596 donors have been published (25). In brief, monocytes  
16 were isolated from whole blood using CD14 immuno-beads and cultured for 7 days with  
17 macrophage colony-stimulating factor (MCS-F) to generate macrophages. The top and bottom  
18 quartiles of *TRIB1*-expressing samples were defined respectively as *TRIB1*<sup>High</sup> and *TRIB1*<sup>Low</sup>.  
19 Comparable sizes of differentially expressed gene lists (n=1842 monocytes; n= 2171, MDM)  
20 were obtained by using FDR adjusted p-values (i.e. q-values) of < 0.01 plus cut-off log-2 fold  
21 changes of > 0.071 (upregulated) and > -0.071 (down-regulated) for the MDM dataset. The



22 Database for Annotation, Visualization and Integrated Discovery version 6.8 was used to identify  
23 for enrichment of functionally related Gene Ontology terms.

24

25 *Gene expression in polarized human macrophages.* Healthy human monocytes were isolated from  
26 whole blood by Ficoll-Paque PLUS (17144003, GE Healthcare) density centrifugation followed  
27 by magnetic selection with CD14 Human MicroBeads (130-050-201, Miltenyi Biotec).  
28 Monocytes were incubated for 7 days with RPMI-1640 (Gibco) supplemented with 100 ng/ml  
29 MCS-F (#300-25-100, PeproTech, UK), 10% FBS (Biowest), 1 mM glutamine (Invitrogen) and  
30 1% penicillin/streptomycin (Gibco), followed by polarization with either 100 ng/ml LPS (581-  
31 007-L002, Enzo Life Sciences, USA) and 20 ng/ml IFN- $\gamma$  (300-02, PeproTech, UK); 20 ng/ml IL-  
32 4 (200-04, PeproTech, UK) or 20 ng/ml IL-10 (#200-10, PeproTech, UK) for 24 h. RNA and RT-  
33 qPCR were performed, as described above using the primer sets listed in **Table S4**.

34

#### 35 **Ox-LDL uptake and HDL-mediated cholesterol efflux.**

36 Assays were performed on BMDMs cultured for 5 days as described above. OLR1 was detected  
37 as described above. For the uptake assays, cells were incubated at 37<sup>0</sup>C for a further 24 h with  
38 human oxLDL (#5685-3557, Bio-Rad) at a concentration of 0  $\mu$ g/ml and 25 $\mu$ g/ml. Total cell  
39 lipids were extracted using 7:11:01 (v/v) chloroform:isopropanol:IGEPAL® CA-630 (#I8896,  
40 Sigma-Aldrich), dried at 50°C and re-suspended in 120 $\mu$ l cholesterol assay buffer (#MAK043,  
41 Sigma-Aldrich). Total cholesterol, free cholesterol and cholesteryl esters were measured using a  
42 Cholesterol quantification kit (#MAK043, Sigma-Aldrich), according to the manufacturer's  
43 instructions. Foam cells were assessed by Oil Red O (60% (v/v) in isopropanol) staining as  
44 described above. For the efflux assays, BMDMs were incubated for 24 hours in DMEM medium  
45 (BE12-604F, Lonza) supplemented with 0.2% (w/v) fatty acid free-BSA (#A8806, Sigma-  
46 Aldrich) and 2.5 $\mu$ M TopFluor® (Bodipy) cholesterol (Avanti® Polar Lipids, Inc. USA). The  
47 medium was removed and the cells washed with PBS and equilibrated for 18 hours in DMEM  
48 supplemented with 0.2% (w/v) fatty acid free BSA. Efflux was measured after a 4-hour incubation  
49 period with 0 $\mu$ g/ml and 50 $\mu$ g/ml of human HDL (#5685-2004, BioRad). Supernatants were  
50 collected and the cells lysed with 1% (w/v) cholic acid (#C1129, Sigma Aldrich) in ethanol.  
51 Cholesterol efflux was calculated as the percentage of fluorescence (excitation 490nm, emission  
52 520nm) in the cell medium at the end of the incubation period divided by the total fluorescence in  
53 the medium and cells.

54

55



## 56 **Statistics**

57 All data are reported as mean  $\pm$  SEM unless stated otherwise in the figure legend. Graphs were  
58 produced and analysed by GraphPad Prism software. Each data point represents a single mouse or  
59 human donor. P values  $<0.05$  were considered significant.

60  
61  
62  
63  
64  
65

## 66 **References and Notes**

67  
68  
69  
70  
71  
72  
73  
74  
75  
76  
77  
78  
79  
80  
81  
82  
83  
84  
85  
86  
87  
88  
89  
90  
91  
92  
93  
94  
95  
96  
97  
98  
99  
00  
01  
02  
03  
04  
05  
06  
07  
08  
09  
10

1. Rocha VZ, Libby P (2009) Obesity, inflammation, and atherosclerosis. *Nat Rev Cardiol* 6(6):399–409.
2. Uchida Y (2017) Recent Advances in Fluorescent Angioscopy for Molecular Imaging of Human Atherosclerotic Coronary Plaque. *J Atheroscler Thromb* 24(6):539–551.
3. Moore KJ, Sheedy FJ, Fisher EA (2013) Macrophages in atherosclerosis: a dynamic balance. *Nat Rev Immunol* 13(10):709–721.
4. Skålén K *et al.* (2002) Subendothelial retention of atherogenic lipoproteins in early atherosclerosis. *Nature* 417(6890):750–754.
5. Schrijvers DM, De Meyer GR, Kockx MM, Herman AG, Martinet W (2005) Phagocytosis of apoptotic cells by macrophages is impaired in atherosclerosis. *Arterioscler Thromb Vasc Biol* 25(6):1256–1261.
6. Tabas I (2010) Macrophage death and defective inflammation resolution in atherosclerosis. *Nat Rev Immunol* 10(1):36–46.
7. Gustafsson M *et al.* (2007) Retention of low-density lipoprotein in atherosclerotic lesions of the mouse: evidence for a role of lipoprotein lipase. *Circ Res* 101(8):777–783.
8. Takahashi M *et al.* (2013) Macrophage lipoprotein lipase modulates the development of atherosclerosis but not adiposity. *J Lipid Res* 54(4):1124–1134.
9. Hofmann A, Brunssen C, Morawietz H (2017) Contribution of lectin-like oxidized low-density lipoprotein receptor-1 and LOX-1 modulating compounds to vascular diseases. *Vascul Pharmacol*
10. Hundal RS *et al.* (2003) Oxidized low density lipoprotein inhibits macrophage apoptosis by blocking ceramide generation, thereby maintaining protein kinase B activation and Bcl-XL levels. *J Biol Chem* 278(27):24399–24408.
11. Getz GS, Reardon CA (2009) Apoprotein E as a lipid transport and signaling protein in the blood, liver, and artery wall. *J Lipid Res* 50 Suppl:S156–61.
12. Baitsch D *et al.* (2011) Apolipoprotein E induces antiinflammatory phenotype in macrophages. *Arterioscler Thromb Vasc Biol* 31(5):1160–1168.
13. Sung HY *et al.* (2012) Enhanced Macrophage Tribbles-1 Expression in Murine Experimental Atherosclerosis. *Biology* 1(1):43–57.
14. Varbo A, Benn M, Tybjaerg-Hansen A, Grande P, Nordestgaard BG (2011) TRIB1 and GCKR Polymorphisms, Lipid Levels, and Risk of Ischemic Heart Disease in the General Population. *Arterioscler Thromb Vasc Biol* 31(2):451–457.
15. Aulchenko YS *et al.* (2009) Loci influencing lipid levels and coronary heart disease risk in 16 European population cohorts. *Nat Genet* 41(1):47–55.
16. Bauer RC, Yenilmez BO, Rader DJ (2015) Tribbles-1: a novel regulator of hepatic lipid metabolism in humans. *Biochem Soc Trans* 43(5):1079–1084.
17. Satoh T *et al.* (2013) Critical role of Trib1 in differentiation of tissue-resident M2-like macrophages. *Nature* 495(7442):524–528.
18. Tao H *et al.* (2015) Macrophage SR-BI mediates efferocytosis via Src/PI3K/Rac1 signaling and reduces atherosclerotic lesion necrosis. *J Lipid Res* 56(8):1449–1460.
19. Clausen BE, Burkhardt C, Reith W, Renkawitz R, Förster I (1999) Conditional gene targeting in macrophages and granulocytes using LysMcre mice. *Transgenic Res* 8(4):265–277.
20. Drechsler M, Megens RT, van Zandvoort M, Weber C, Soehnlein O (2010) Hyperlipidemia-triggered neutrophilia promotes early atherosclerosis. *Circulation* 122(18):1837–1845.
21. Hasty AH *et al.* (1999) Retroviral gene therapy in ApoE-deficient mice: ApoE expression in the artery wall reduces early foam cell lesion formation. *Circulation* 99(19):2571–2576.

- 11 22. Björklund MM *et al.* (2014) Induction of atherosclerosis in mice and hamsters without germline genetic  
12 engineering. *Circ Res* 114(11):1684–1689.
- 13 23. Norata GD, Tavori H, Pirillo A, Fazio S, Catapano AL (2016) Biology of proprotein convertase subtilisin  
14 kexin 9: beyond low-density lipoprotein cholesterol lowering. *Cardiovasc Res* 112(1):429–442.
- 15 24. Arndt L *et al.* (2018) Tribbles homolog 1 deficiency modulates function and polarization of murine bone  
16 marrow-derived macrophages. *J Biol Chem* 293(29):11527–11536.
- 17 25. Schunkert H *et al.* (2011) Large-scale association analysis identifies 13 new susceptibility loci for coronary  
18 artery disease. *Nat Genet* 43(4):333–338.
- 19 26. Ference BA *et al.* (2017) Low-density lipoproteins cause atherosclerotic cardiovascular disease. 1. Evidence  
20 from genetic, epidemiologic, and clinical studies. A consensus statement from the European Atherosclerosis  
21 Society Consensus Panel. *Eur Heart J* 38(32):2459–2472.
- 22 27. Chui PC, Guan HP, Lehrke M, Lazar MA (2005) PPARgamma regulates adipocyte cholesterol metabolism via  
23 oxidized LDL receptor 1. *J Clin Invest* 115(8):2244–2256.
- 24 28. Schaeffer DF *et al.* (2009) LOX-1 augments oxLDL uptake by lysoPC-stimulated murine macrophages but is  
25 not required for oxLDL clearance from plasma. *J Lipid Res* 50(8):1676–1684.
- 26 29. Guan H *et al.* (2016) Competition between members of the tribbles pseudokinase protein family shapes their  
27 interactions with mitogen activated protein kinase pathways. *Sci Rep* 6:32667.
- 28 30. Hunerdosse DM *et al.* (2014) Chemical genetics screening reveals KIAA1363 as a cytokine-lowering target.  
29 *ACS Chem Biol* 9(12):2905–2913.
- 30 31. Rahman K *et al.* (2017) Inflammatory Ly6Chi monocytes and their conversion to M2 macrophages drive  
31 atherosclerosis regression. *J Clin Invest* 127(8):2904–2915.
- 32 32. Peled M *et al.* (2017) A wild-type mouse-based model for the regression of inflammation in atherosclerosis.  
33 *PLoS One* 12(3):e0173975.
- 34 33. Sasaki Y *et al.* (2006) Canonical NF-kappaB activity, dispensable for B cell development, replaces BAFF-  
35 receptor signals and promotes B cell proliferation upon activation. *Immunity* 24(6):729–739.
- 36 34. Houthuys E, Movahedi K, De Baetselier P, Van Ginderachter JA, Brouckaert P (2010) A method for the  
37 isolation and purification of mouse peripheral blood monocytes. *J Immunol Methods* 359(1-2):1–10.
- 38 35. Ghosn EE *et al.* (2010) Two physically, functionally, and developmentally distinct peritoneal macrophage  
39 subsets. *Proc Natl Acad Sci U S A* 107(6):2568–2573.
- 40 36. Stary HC *et al.* (1995) A definition of advanced types of atherosclerotic lesions and a histological  
41 classification of atherosclerosis. A report from the Committee on Vascular Lesions of the Council on  
42 Arteriosclerosis, American Heart Association. *Arterioscler Thromb Vasc Biol* 15(9):1512–1531.
- 43 37. Park YM (2014) CD36, a scavenger receptor implicated in atherosclerosis. *Exp Mol Med* 46:e99.
- 44 38. Chen Y *et al.* (2006) The di-leucine motif contributes to class a scavenger receptor-mediated internalization of  
45 acetylated lipoproteins. *Arterioscler Thromb Vasc Biol* 26(6):1317–1322.
- 46 39. Xue J *et al.* (2014) Transcriptome-based network analysis reveals a spectrum model of human macrophage  
47 activation. *Immunity* 40(2):274–288.
- 48  
49

## 50 Acknowledgments

51  
52 **General:** We would like to thank Dr Markus Ariaans, Mr Carl Wright and the BSU staff  
53 at the University of Sheffield for their technical support during the *in vivo* experiments; Ms  
54 Fiona Wright for tissue processing and histology; Dr Steven Haynes for mouse genotyping  
55 and Ms Laura Martínez-Campesino for assistance and logistical support.

56  
57 **Funding:** This work was supported by a Transatlantic Network of Excellence grant  
58 10CVD03 from the Fondation Leducq to EKT and DR, funds from the British Heart  
59 Foundation (PG/16/44/32146 to EKT, SF, CCS) and BBSRC (BB/J00152X/1 and  
60 BB/J004472/1 to MT). The CTS data were provided by the Cardiogenics project, which was  
61 supported by the European Union 6<sup>th</sup> Framework Programme (LSHM-CT-2006-037593).

62

63  
64  
65  
66  
67  
68  
69  
70  
71  
72  
73  
74  
75  
76  
77  
78  
79  
80  
81  
82  
83  
84  
85  
86  
87  
88  
89  
90  
91  
92  
93  
94  
95  
96  
97  
98  
99  
00  
01  
02  
03  
04  
05  
06  
07  
08  
09  
10

**Author contributions:**

Designing research studies: TND, HLW, AHG, DR, CCS, SEF, EKT

Conducting experiments and acquiring data: JMJ, AA, RB, KB, TND, MT, SEF

Analyzing data: JMJ, RB, SH, SKS, KB, ZH, TND, HLW, AHG, CCS, SEF, EKT

Writing the manuscript: JMJ, HLW, AHG, SEF, CCS, EKT

**Competing interests:** The authors have declared that no conflict of interest exists.

## Figures and Tables

### Fig. 1. Generation and Characterization of Myeloid-specific Strains of *Trib1*-Knock-out and Transgenic Mice

(A) Immunohistochemistry of human atherosclerotic plaque (P). TRIB1 (red). CD68+ macrophages (brown). (ii) Magnification (x40) of boxed area highlighting one of the double positive cells. (iii) Isotype control (Scale: 50 $\mu$ m). (B) Schematic of the *Trib1* ‘knockout-first’ targeting construct used to produce null, conditional-ready/floxed (tm1c) and conditional-null (tm1d) alleles. Predicted transcripts below. FRT, flippase recognition target; SA, splice acceptor sequence; pA, polyadenylation signal; IRES, internal ribosomal entry site; LacZ,  $\beta$ -galactosidase; Neo, neomycin resistance gene. (C) The tm1c (*Trib1*<sup>mWT</sup>) allele created via flippase recombinase-mediated removal of the ‘gene-trap’ cassette. (D) The null/conditional-*Trib1* allele (tm1d) produced by crossing tm1c and Cre-expressing mice. Viability data for mice carrying these three *Trib1* alleles are provided in Fig S1. (E) *Rosa26*-STOP-*Trib1*-eGFP transgene construct used to produce *Trib1*<sup>mWT</sup> and *Trib1*<sup>mTg</sup> mice. (F) Cre-mediated excision of the STOP cassette enables transcription of the bi-cistronic *Trib1*-eGFP transcript from the endogenous *Rosa26* promoter (indicated by bent arrow). (G) *Trib1* RNA (relative to *Actb*) in bone marrow derived macrophages (BMDMs) from homozygous tm1c (i.e. *Trib1*<sup>mWT</sup>) and *Trib1*<sup>mKO</sup> mice (n=3 per group). Percentages of monocytes and peritoneal macrophages from *Trib1*<sup>mTg</sup> mice (n=3 per group) expressing eGFP. *Trib1* RNA levels in BMDMs from *Trib1*<sup>mTg</sup> mice, expressed relative to *Trib1*<sup>mWT</sup> (n=5-7 per group). (H) Blood cell counts of mixed-gender *Trib1*<sup>mKO</sup> (top panels) and *Trib1*<sup>mTg</sup> (bottom panels) and their respective WT littermates (N= 5-6 per group). Data are mean  $\pm$  SEM. Significance was determined by Student’s t-test, \**P* <0.05 and \*\**P* <0.01.

### Fig. 2. Myeloid *Trib1* Transgenic (*Trib1*<sup>mTg</sup>) Expression Increases Atherosclerosis Burden in Two Murine Models of Human Atherosclerosis.

(A) Schematic of the bone marrow transplant experiment. Bone marrow cells from myeloid-specific *Trib1* knock out (KO) and transgenic (Tg) mice and their respective wild-type (WT) controls were transplanted into *ApoE*<sup>-/-</sup> recipients. (B) Representative *en face* Oil red O (ORO) staining of thoracic aortas from specified chimeras following the Western diet, and quantification. Lesion areas were calculated as percentages of the total surface area of the whole aorta and normalised (median,  $\pm$  95% CI) to *Trib1*<sup>mWT</sup>; n=10-18 per group. (C) Representative images of Elastic van Gieson-stained aortic sinus lesions and quantification (n=10-16 mice per group). (D) Strategy used to determine the consequences of m*Trib* transgene expression on atheroma burden in mice expressing adenovirus-produced proprotein convertase subtilisin/kexin 9 (PCSK9). (E)

48 LDLR protein in cell lysates of liver samples harvested from specified mice was detected by  
49 Western Blot and quantified (n=3, per group). **(F)** Representative *en face* ORO staining of  
50 thoracic aortas from *Trib1<sup>mWT</sup>*-PCSK9 (top) and *Trib1<sup>mTg</sup>*-PCSK9 (bottom) mice. Lesion areas  
51 were calculated as percentages of the total surface areas of the whole aorta (n=6-7 per group). **(G)**  
52 Representative images of Elastic van Gieson-stained aortic sinus lesions of specified mice and  
53 quantification (n=5-7 per group). In **C** and **G**, scale bar = 200 $\mu$ m In **B**, **C**, **F** and **G** data are  
54 expressed relative to mWT. Data are mean  $\pm$  SEM. Significance was determined by one-way  
55 ANOVA (**B**, **C**), two-way ANOVA (**e**) or student's t-test (**F**, **G**). \* $P$  <0.05, \*\*\* $P$  <0.001, \*\*\*\* $P$   
56 <0.0001.

57

### 58 **Fig. 3. Myeloid-Trib1 Induces Foam Cell Expansion**

59 **(A)** MAC-3 staining (brown) of representative cross-sections of the aortic sinus from specified  
60 mice (magnification x20, scale: 100 $\mu$ m). Dashed line indicates boundaries of lesions. Higher  
61 magnification (x40) of boxed area highlights the high number of foam cells (arrows) in the aortic  
62 sinus plaque of *Trib1<sup>mTg</sup>* $\rightarrow$ *ApoE<sup>-/-</sup>* mice. **(B)** Staining of aortic sinus lesions from specified  
63 chimeric mice with specified antibodies: First panel, MAC-3 (n= 9-12 per group). Second panel,  
64 YM1/MAC-3 double-positive cells (n= 7-14 per group). Third, NOS2/MAC-3 double positive  
65 cells (n=10-16 per group). **(C)** Quantification of relative foam cell numbers (top) and size  
66 (bottom) in specified chimeric mice; *Trib1<sup>mWT</sup>* $\rightarrow$ *ApoE<sup>-/-</sup>* and *Trib1<sup>mTg</sup>* $\rightarrow$ *ApoE<sup>-/-</sup>* mice. N = 10-16,  
67 per group. **(D)** Representative image of aortic sinus lesion (scale: 30 $\mu$ m) from a *Trib1<sup>mWT</sup>* and  
68 *Trib1<sup>mTg</sup>* mice injected with PCSK9 (n=9-11, per group, with arrows highlighting foam cells.  
69 Quantification of relative MAC-3 staining, foam cell numbers and size (n=6-7 per group). **(E)**  
70 Correlation between (1<sup>st</sup> panel) foam cell number and MAC-3+ staining in plaque of aortic sinus  
71 lesions of specified *Trib1<sup>mTg</sup>* $\rightarrow$ *ApoE<sup>-/-</sup>* chimeric mice; (2<sup>nd</sup> panel) foam cell size (y axis) and  
72 MAC-3 staining and (3<sup>rd</sup> panel) plasma cholesterol levels (y axis) and macrophage staining.  
73 MAC-3+ immune-reactive area expressed as percentage (%) of total lesion area in aortic sinus.  $R^2$   
74 = Pearson correlation coefficient. In **B - D**, data (mean  $\pm$  SEM) are expressed relative to wild-type  
75 (WT). Significance was determined by one-way ANOVA (**B**) or student's t-test (**C**, **D**). \* $P$  <0.05,  
76 \*\* $P$  <0.01, \*\*\* $P$  <0.001

77

78

79

80

81

82

83  
84  
85  
86

#### **Fig. 4. Myeloid TRIB1 Expression Induces Reciprocal Changes in oxLDL- and HDL-Receptor Expression in Human and Mouse Macrophages.**

87 **(A)** Comparison of *TRIB1* RNA levels in monocytes and monocyte-derived macrophages  
88 (MDMs) in participants of the Cardiogenics Transcriptomic Study (25). The correlation  
89 ( $R^2 < 0.001$ ,  $p = 0.47$ ) was performed on 596 paired monocyte and MDM samples. **(B)** MDM  
90 ( $n = 596$ ) and monocytes ( $n = 758$ ) were ranked according to *TRIB1* RNA levels. Data represent  
91 log<sub>2</sub>-fold changes (FC) in RNA levels of specified genes in *TRIB1*<sup>High</sup> ( $n = 149$ ) versus *TRIB1*<sup>Low</sup>  
92 ( $n = 149$ ) MDM, with associated P values provided above the bars. Green bars indicate  
93 concordant changes in transcript levels of representative genes in human *TRIB1*<sup>High</sup> MDMs and  
94 *Trib1*<sup>mTg</sup> BMDMs. **(C)** FC and associated P values for differential expression of specified RNAs  
95 encoding representative scavenger receptors, including CD36, which mediates (ox)-  
96 phospholipid and long chain fatty acid uptake (37), the acetylated-LDL scavenging receptor (38)  
97 and Macrophage Scavenger Receptor (38). Comparisons are between *TRIB1*<sup>HIGH</sup> ( $n = 149$ ) versus  
98 *TRIB1*<sup>LOW</sup> ( $n = 149$ ) MDMs and between *TRIB1*<sup>HIGH</sup> ( $n = 191$ ) versus *TRIB1*<sup>LOW</sup> ( $n = 191$ )  
99 monocytes. **(D)** RT-qPCR quantification of RNA levels in bone marrow derived macrophages  
00 (BMDM) prepared from specified mice ( $n = 5-9$  per group mean  $\pm$  SEM).  $n = 5$  **(E)**  
01 Immunocytochemistry of non-polarised *Trib1*<sup>mWT</sup> and *Trib1*<sup>mTg</sup> BMDMs. OLR1 (red), nuclei  
02 counterstained with DAPI (blue). Scale: 50 $\mu$ m. Quantification performed on BMDMs prepared  
03 from 4-5 mice per group. **(F)** Western blot analysis of OLR1 in *Trib1*<sup>mWT</sup> and *Trib1*<sup>mTg</sup> BMDMs  
04 ( $n = 3-5$  per group). In **D - F**, significance was determined by student's t-test, \* $P < 0.05$ , \*\* $P < 0.01$   
05

#### **Figure 5: Myeloid-Trib1 Increases Cholesterol Uptake and Neutral Lipid Accumulation**

06  
07  
08 **(A)** Representative images (Scale: 50 $\mu$ m) of aortic sinus lesions from specified mice and enlarged  
09 images. Dashed lines indicate boundaries of lesions. MAC-3 (green), OLR1 (red), nuclei  
10 counterstained with DAPI (blue). Arrows indicate OLR1- positive macrophages. Arrowheads  
11 indicate assumed a-cellular OLR1. Quantification: *Trib1*<sup>mWT</sup>  $\rightarrow$  *ApoE*<sup>-/-</sup> and *Trib1*<sup>mTg</sup>  $\rightarrow$  *ApoE*<sup>-/-</sup>  
12 chimeras, 9 per group; *mTrib1*-PCSK9, 5-6 per group (mean  $\pm$  SEM). **(B)** Intracellular total  
13 cholesterol (TC) and cholesteryl esters (CE) contents of *Trib1*<sup>mTg</sup> and *Trib1*<sup>mWT</sup> bone marrow  
14 cells differentiated into macrophages and incubated with 25 $\mu$ g/ml of oxLDL for 24 hours ( $n = 4$   
15 per group). **(C)** Representative image of BMDMs stained with Oil Red O (Scale: 50 $\mu$ m).  
16 Quantification was performed on three fields of view per sample. **(D)** Quantification of  
17 cholesterol efflux from cholesterol-loaded BMDMs to human HDL ( $n = 8-9$  per group). RT-qPCR



18 quantification of *Abca1* and *Abcg1* RNA in non-polarised BMDMs prepared from specified mice  
19 (n= 7-8 per group). Data are mean  $\pm$  SEM. Significance determined by student's t-test (**A, D**;  
20 *bottom panel*) or two-way ANOVA with Sidak's multiple comparisons post-test (**B-D**) \* $P < 0.05$ ,  
21 \*\* $P < 0.01$ , \*\*\*\* $P < 0.001$ .

22 **Fig. 6. Model Summarising the Proposed Effects of Differences in mTRIB1 Expression on**  
23 **Foam Cell Expansion in Early-stage Atherosclerosis.**

24  
25 Factors up-regulating m*TRIB1* expression in human monocyte-derived macrophages and plaque-  
26 macrophages increase cholesterol and neutral lipid uptake, with no compensatory rise in  
27 cholesterol-efflux. Schematic recognises that increased OLR1 expression increases the probability  
28 of this scavenger receptor assembling as a hexamer made up of three homodimers on the  
29 macrophage cell surface and that this configuration leads to a marked increase in its affinity for  
30 oxLDL (9) and, hence OLR1-mediated uptake of oxLDL lipids. In the setting of no compensatory  
31 rise in HDL-mediated cholesterol efflux, accelerated foam cell expansion and increased atheroma  
32 burden ensue, highlighting the therapeutic potential of inhibiting macrophage Tribbles 1  
33 expression to block the gene expression changes that promote macrophage cholesterol and  
34 cholesteryl ester accumulation and prevent increased hydrolysis of accumulated cholesteryl-ester  
35 and thus, the up-regulation of the reverse cholesterol transport pathway to mediate the removal of  
36 cholesterol from the arterial wall.

37 **Supplementary Materials**

38

39 **SFig. 1. Expected and observed numbers of 8-week old offspring with specified *Trib1***  
40 **genotypes**

41

42 **(A)** The *Trib1* 'KO-first' targeting construct contains elements to produce a full-body *Trib1*  
43 deletion-null allele (*tma1*). No offspring with a *tma1/tma1* genotype were identified from this  
44 cross involving two heterozygote parents. **(B)** The expected numbers of mice with each of the  
45 three theoretical genotypes (i.e. homozygous WT (+/+), heterozygous (+/*tma1c*) and homozygous  
46 (*tma1c/tma1c*) from crossing two heterozygote parents were obtained. **(C)** Homozygous  
47 conditional-ready (i.e. floxed) *Trib1* null mice (i.e. *tma1c/tma1c*) were crossed with the  
48 heterozygous universal-Cre-recombinase mouse strain B6.Cg-Tg(UBC-cre/ERT2)1Ejb/J. N.B the  
49 fewer than expected mice homozygous for *Tma1d*-null *Trib1* allele. **(D)** Genotype distribution of  
50 offspring with the (*tma1*) *Trib1* deletion null allele on a mixed genetic (C57BL/6 x 129S9)



51 background. **(E)** Representative gating strategy showing SSC-A and FSC-A plots of specified cell  
52 populations from blood and bone marrow **(F)** from 10-14 week old *Trib1*<sup>mWT</sup> and *Trib1*<sup>mTg</sup> mice  
53 (n=4). Live/dead cell discrimination was determined by Zombie NIR amine-reactive dye staining.  
54 CD11b<sup>+</sup> cells were subdivided based on their expression of Ly6C (Y axis) and Ly6G (X-axis).  
55 Arrows indicate the fate of specific cell populations. **(G)** TRIB1-GFP expressing cells in  
56 CD11b<sup>+</sup>Ly6C<sup>+</sup>Ly6G<sup>-</sup> (top left quadrants of (F)) and CD11b<sup>+</sup>Ly6C<sup>-</sup>Ly6G<sup>+</sup> (bottom right quadrants  
57 of (f)). (H, I) Quantification of GFP-positive cells within CD11b<sup>+</sup>Ly6C<sup>+</sup>Ly6G<sup>-</sup> and CD11b<sup>+</sup>Ly6C<sup>-</sup>  
58 Ly6G<sup>+</sup> populations of blood and bone marrow cells (n=4, mean ± SEM).

59  
60

61 **SFig. 2. *Trib1*<sup>mKO</sup> and *Trib1*<sup>mTg</sup> mice have normal tissue anatomy and F4/80+ macrophage**  
62 **numbers**

63  
64 **(A)** Representative H&E staining of adipose tissue (visceral) cross-sections from 10-week old  
65 specified mice fed on chow diet. Middle panel, mean adipocyte area of samples (n=3-7, mean ±  
66 SEM); Left panel, F4/80+ macrophages contents of adipose tissue samples from specified mice  
67 (n=3-7, mean ± SEM). **(B)** Representative H&E staining of liver cross-sections and levels of  
68 F4/80+ macrophages in the liver (n=3-9, mean ± SEM); Scale, 20µm. **(C)** Representative IF  
69 staining of spleens from *Trib1*<sup>mKO</sup>, *Trib1*<sup>mWT</sup> and *Trib1*<sup>mTg</sup> mice stained with F4/80 (red, left  
70 panels) and CD206 (green, right panels). Dotted lines indicate outlines of red and white splenic  
71 pulp. Scale: 50µm. ns: non-significant.

72

73 **SFig. 3. Plasma lipid levels of chimera and Pcsk9 mice.**

74

75 **(A)** Plasma lipid levels of specified chimera mice following seven weeks recovery and 12 weeks on  
76 Western Diet (n=6-12, mean ± SEM). **(B)** Total plasma cholesterol and triglyceride of mTrib1 Pcsk9 mice  
77 (n=7, mean ± SEM). **(C)** Correlations in specified mice between total plasma cholesterol (left panel),  
78 HDL-C (centre) and LDL-C (right panel) vs. oil Red O (top panels) and MAC-3<sup>+</sup> immuno-reactive areas  
79 (bottom two panels), expressed as percentage (%) of total lesion area in aortic sinus. Data shows Pearson  
80 correlation co-efficient (R<sup>2</sup>) along with P value (n=9-10).

81

82 **SFig. 4. Atherosclerotic burden in m*Trib1* → ApoE<sup>-/-</sup> mice, clinical grading of lesions and**  
83 **presence of foam cells.**

84

85 **(A)** *en face* oil Red O staining of the thoracic aortas (n=6-15, mean ± SEM) and **(B)** lesion sizes  
86 in the aortic sinus (n=6-12, mean ± SEM) of *Trib1*<sup>mWT</sup> → ApoE<sup>-/-</sup> versus *Trib1*<sup>mTg</sup> → ApoE<sup>-/-</sup> (left-  
87 hand panels) and *Trib1*<sup>mWT</sup> → ApoE<sup>-/-</sup> versus *Trib1*<sup>mKO</sup> → ApoE<sup>-/-</sup> (right-hand panels) mice. Data  
88 are expressed as a percentage (%) of total surface area of the whole aorta. **(C)** Pathological

89 grading of aortic sinus lesions assessing plaque fibrosis (left panel) and overall Stary Grade (e.g. 1  
90 = presence of macrophage foam cells, 2 = presence of intracellular lipid accumulation, 3=  
91 presence of extracellular lipid pools) (centre panel) including featured of necrosis and  
92 haemorrhage. Multiple lesions per mouse (n=10-16, mean  $\pm$  minimum and maximum) were  
93 scored indicate early stage lesions. Collagen content in the aortic sinus was quantified with  
94 Martius Scarlet Blue (right panel, n=10-16, mean  $\pm$  SEM). **(D)** Representative image of aortic  
95 sinus lesion (scale: 30 $\mu$ m) from *mTrib1* $\rightarrow$  *ApoE*<sup>-/-</sup> mice, with arrows highlight foam cells.  
96 Significances were determined by student's t-test **(A-B)** or one-way ANOVA **(C)**. Ns, non-  
97 significant, \**P*<0.05, \*\**P*<0.01.

98  
99 **SFig. 5. Reciprocal regulation of OLR1 and SCARB1 RNA levels in polarised MDMs**

00  
01 **(A)** *OLR1* and *SCARB1* RNA levels were quantified by RT-qPCR in human MDMs polarised  
02 with interferon  $\gamma$  + lipopolysaccharide (IFN  $\gamma$  + LPS), IL-4 and IL-10. Each data point represents  
03 data from one donor (n=8). Log<sub>2</sub>-fold changes (mean  $\pm$  SEM) are plotted relative to non-polarised  
04 cells. **(B)** Fold-changes in levels of specified transcripts in human MDMs polarised with lauric  
05 acid (LA), linoleic acid (LIA), oleic and (OA) and HDL. Data were extracted from transcriptome  
06 analysis of Xue and colleagues (39).

07  
08  
09  
10  
11  
12  
13  
14  
15  
16  
17  
18  
19  
20  
21  
22  
23  
24  
25  
26  
27  
28

# Figure 1

## A

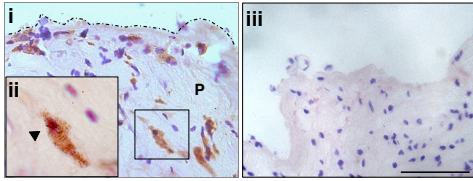

## B

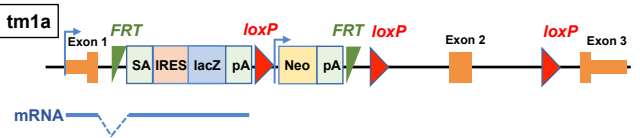

## C

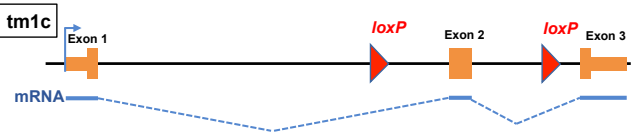

## D

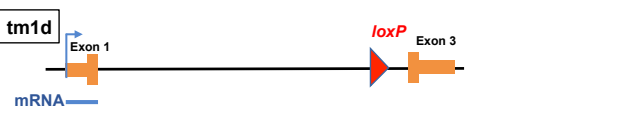

## Rosa26 locus

## E

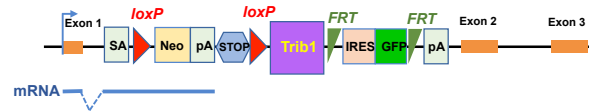

## F

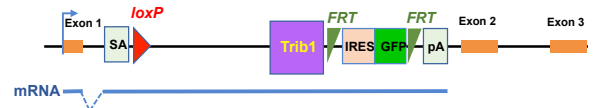

## G

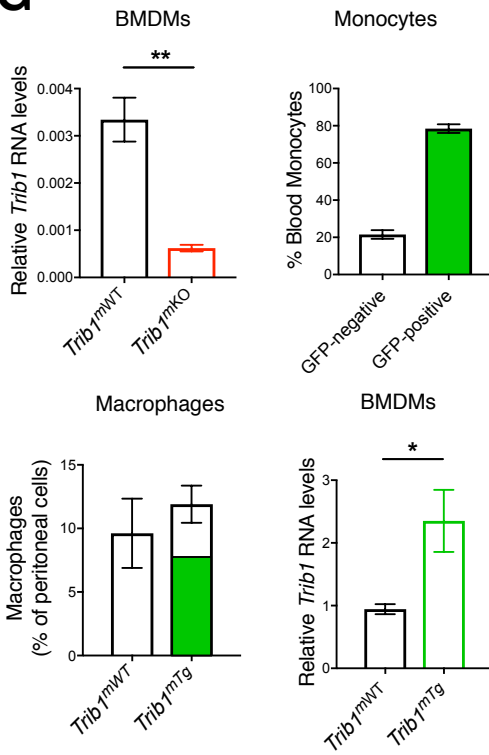

## H

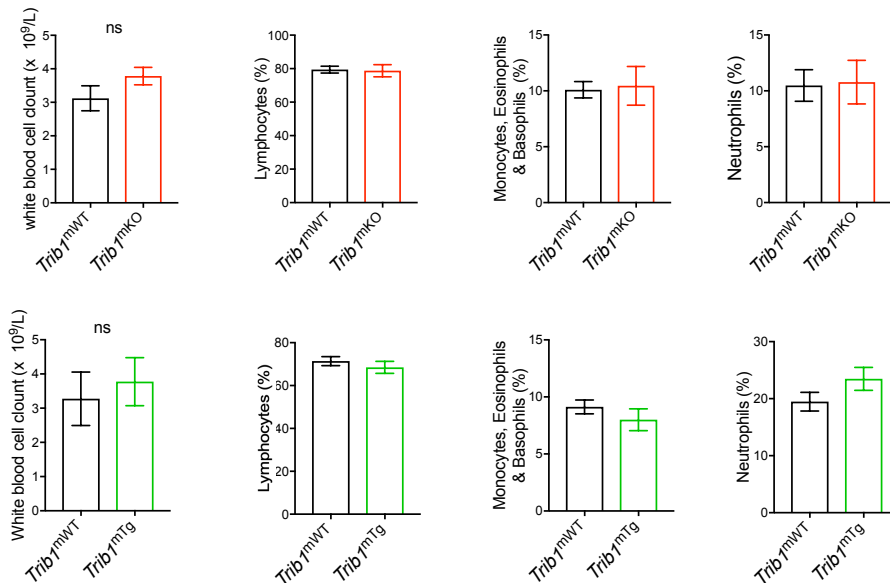

# Figure 2

## A

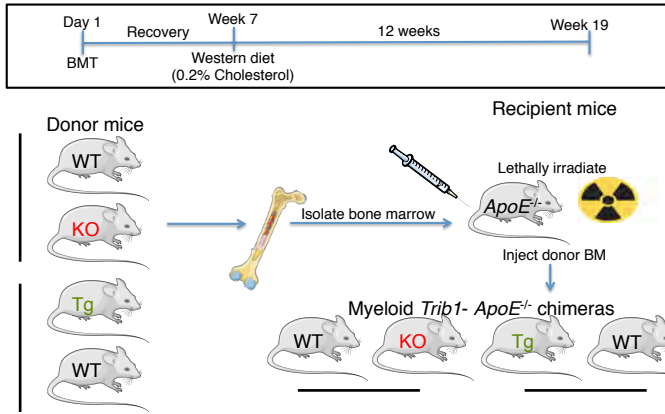

## D

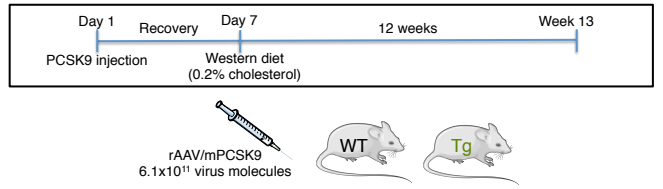

## E

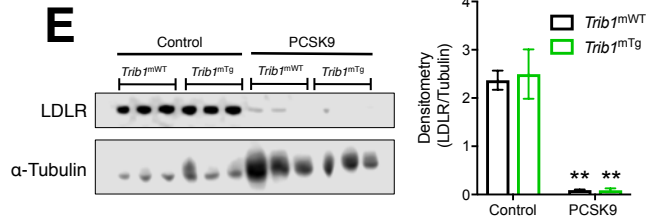

## B

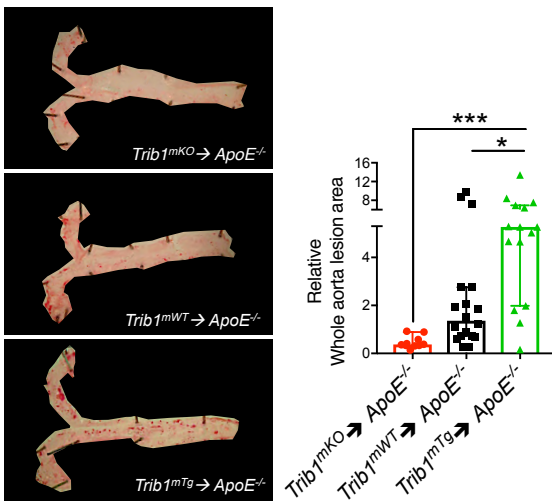

## F

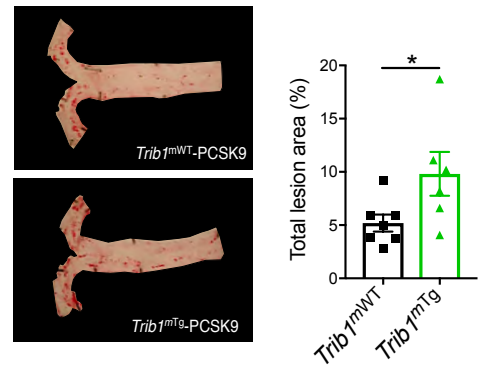

## C

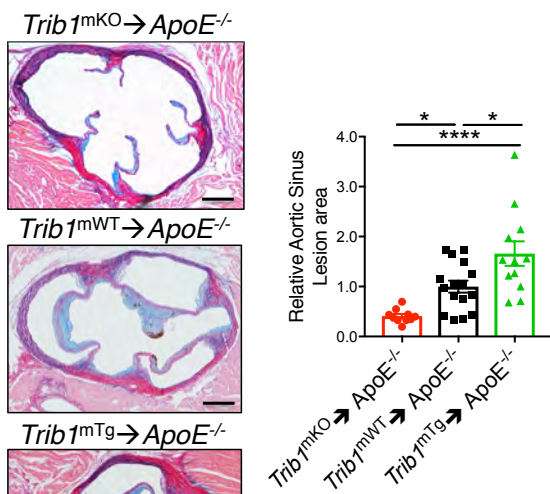

## G

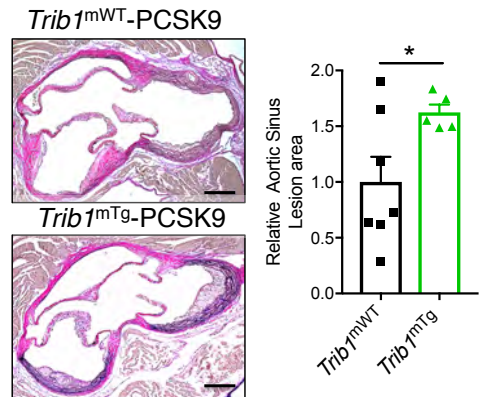

# Figure 3

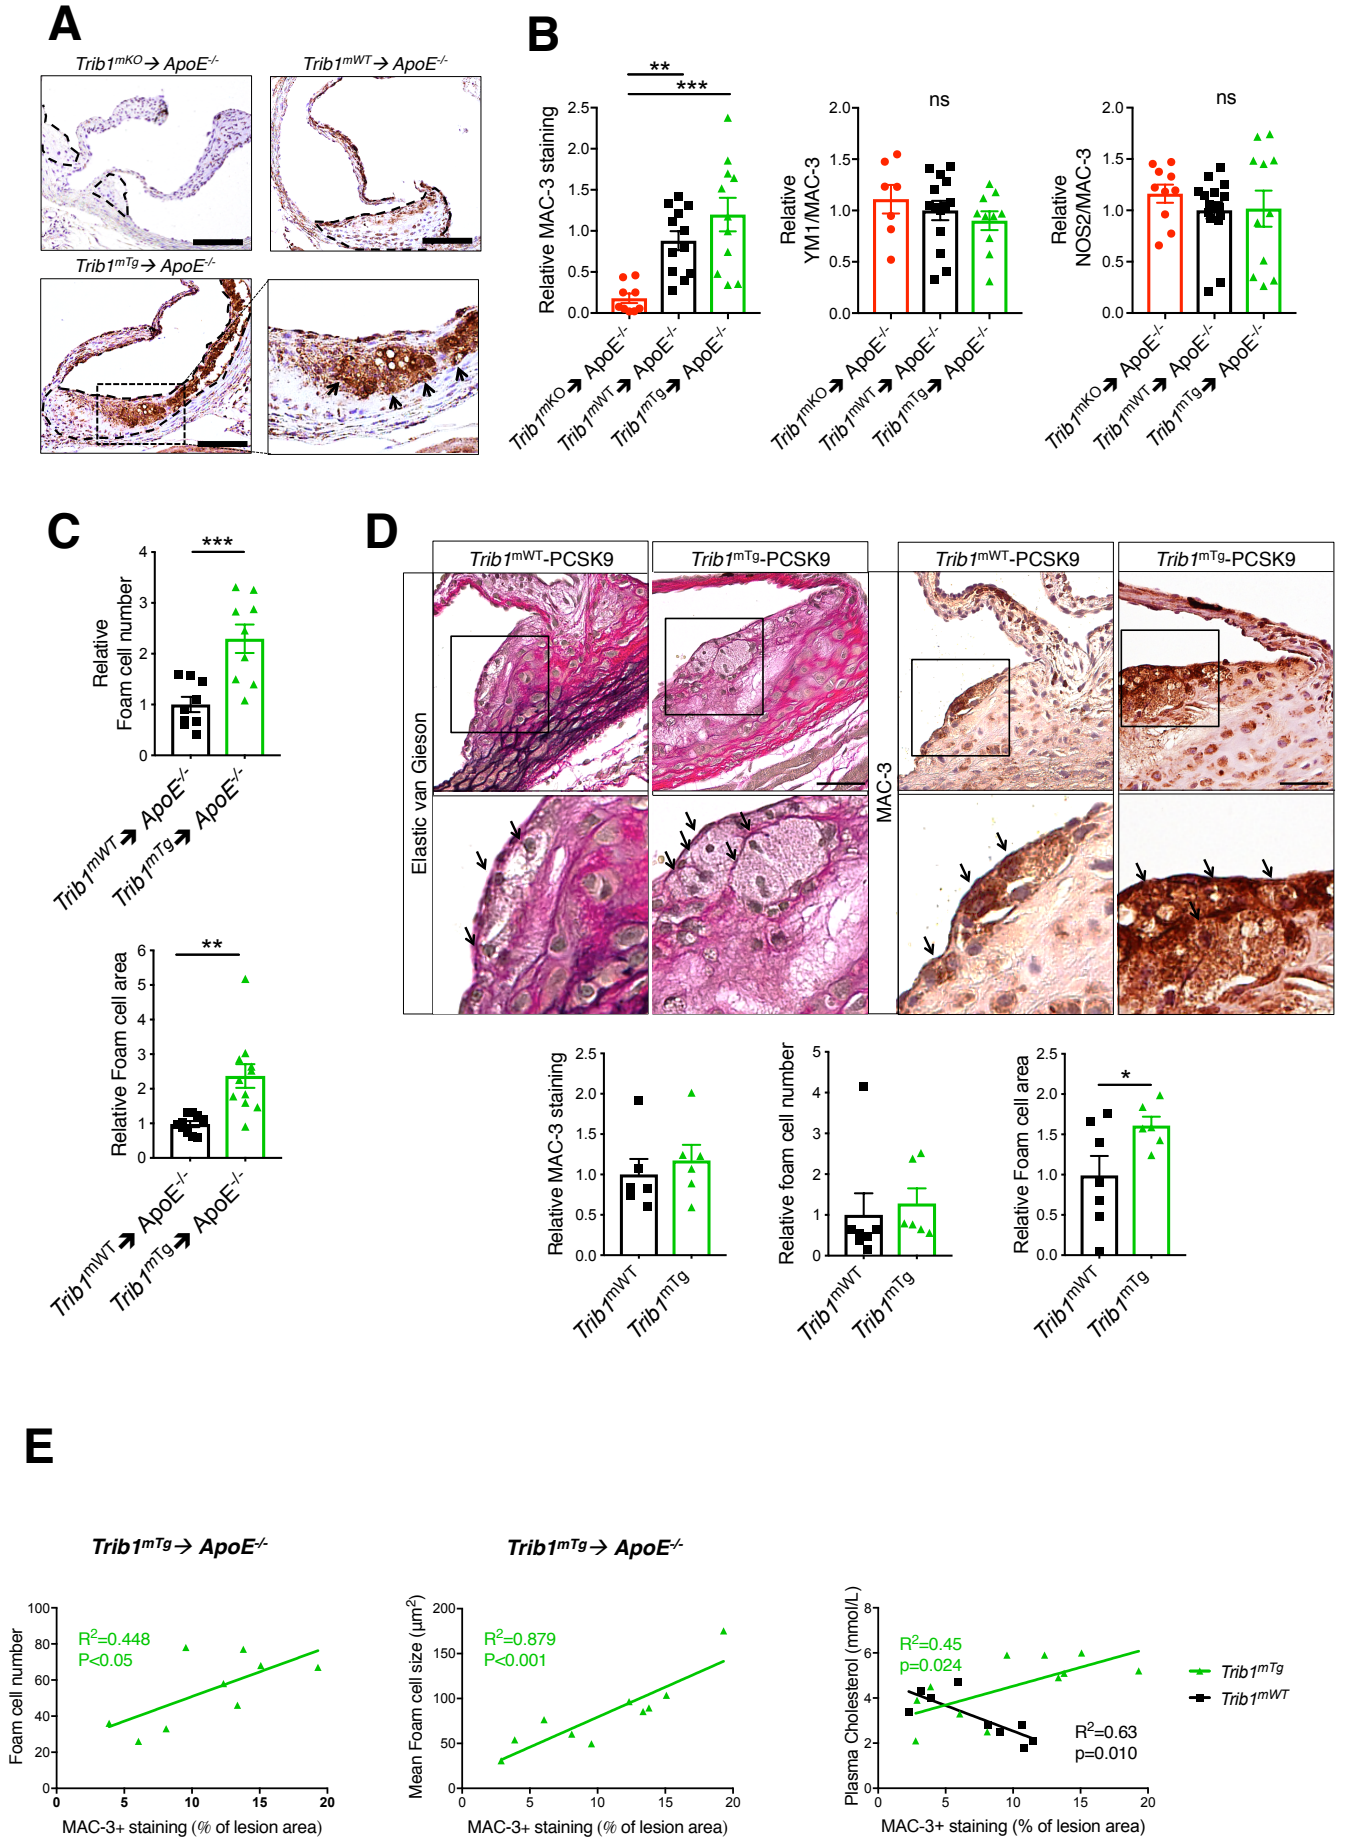

# Figure 4

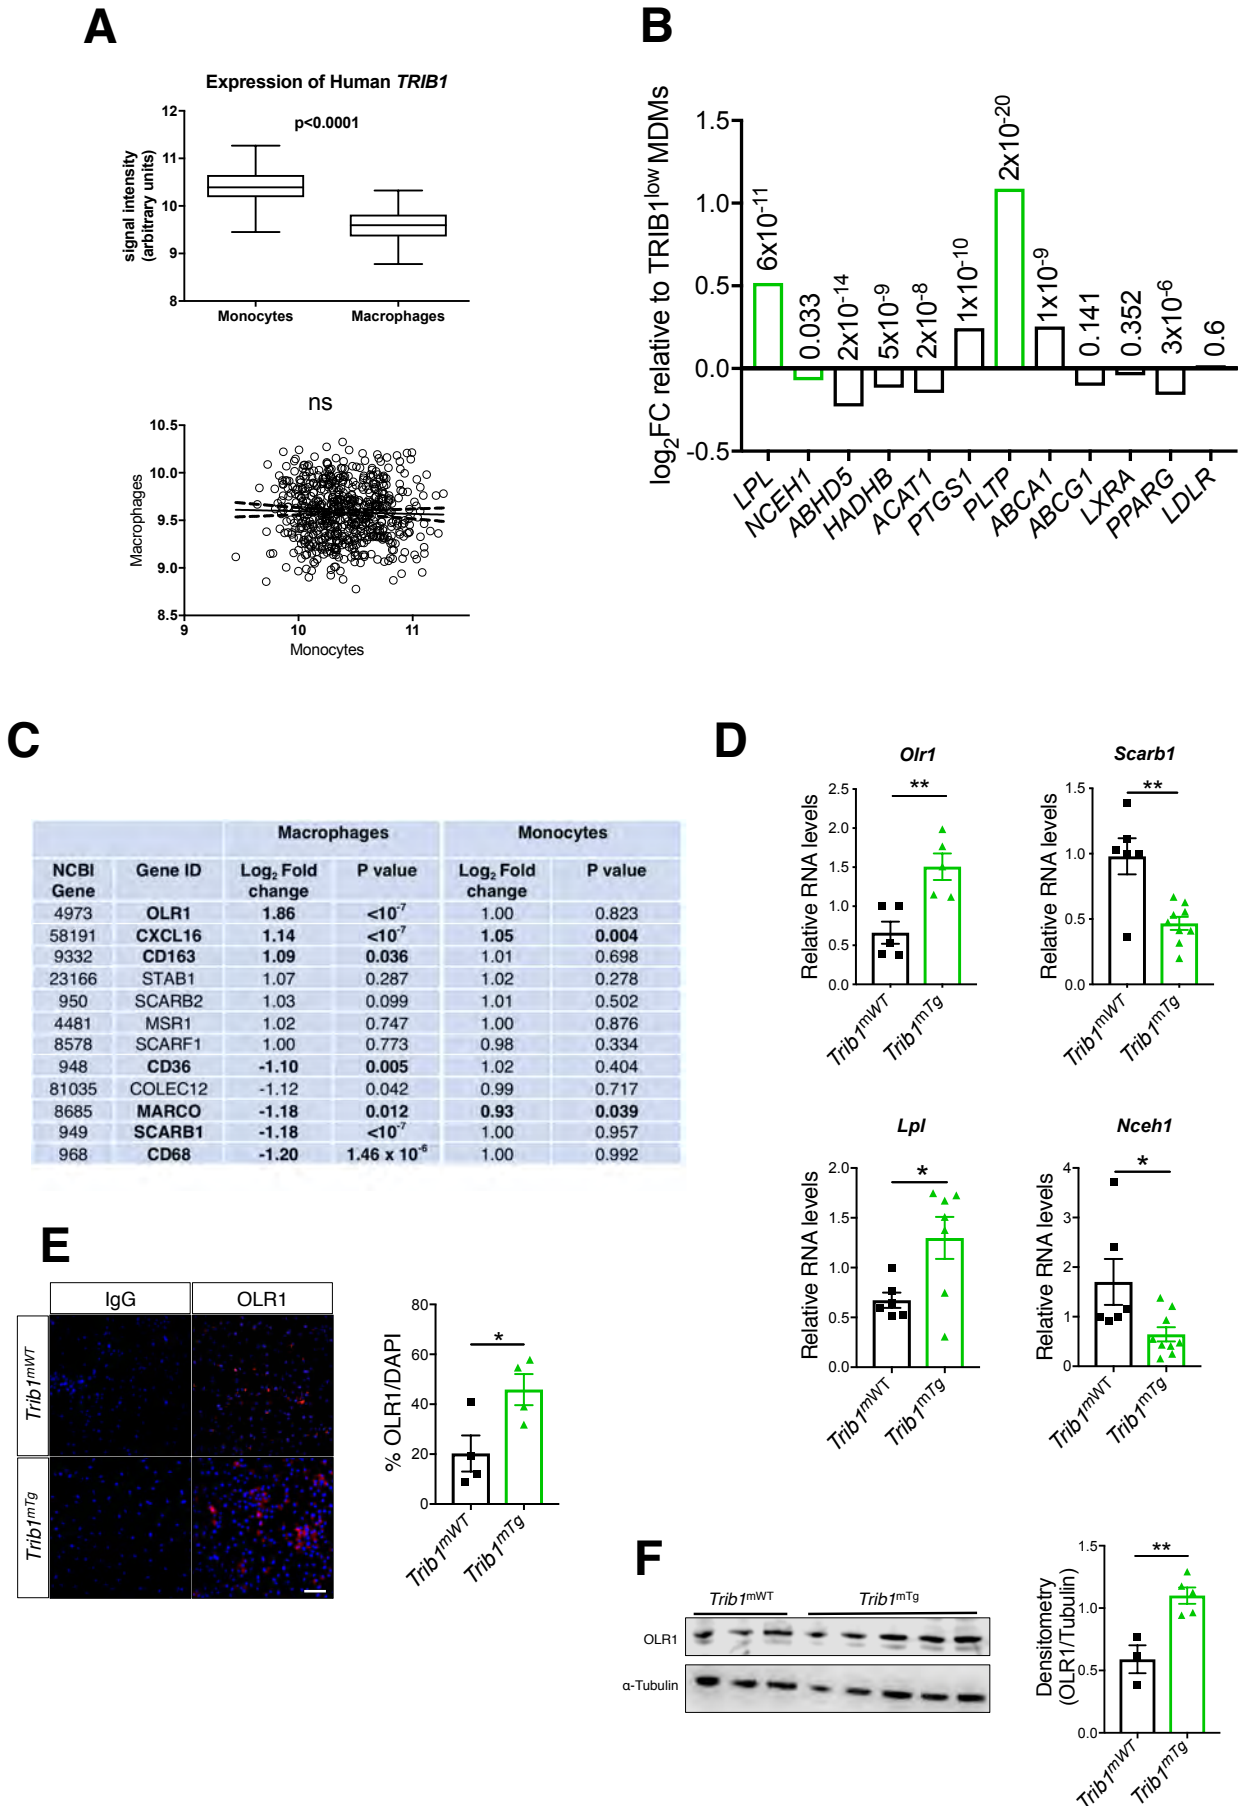



# Figure 5

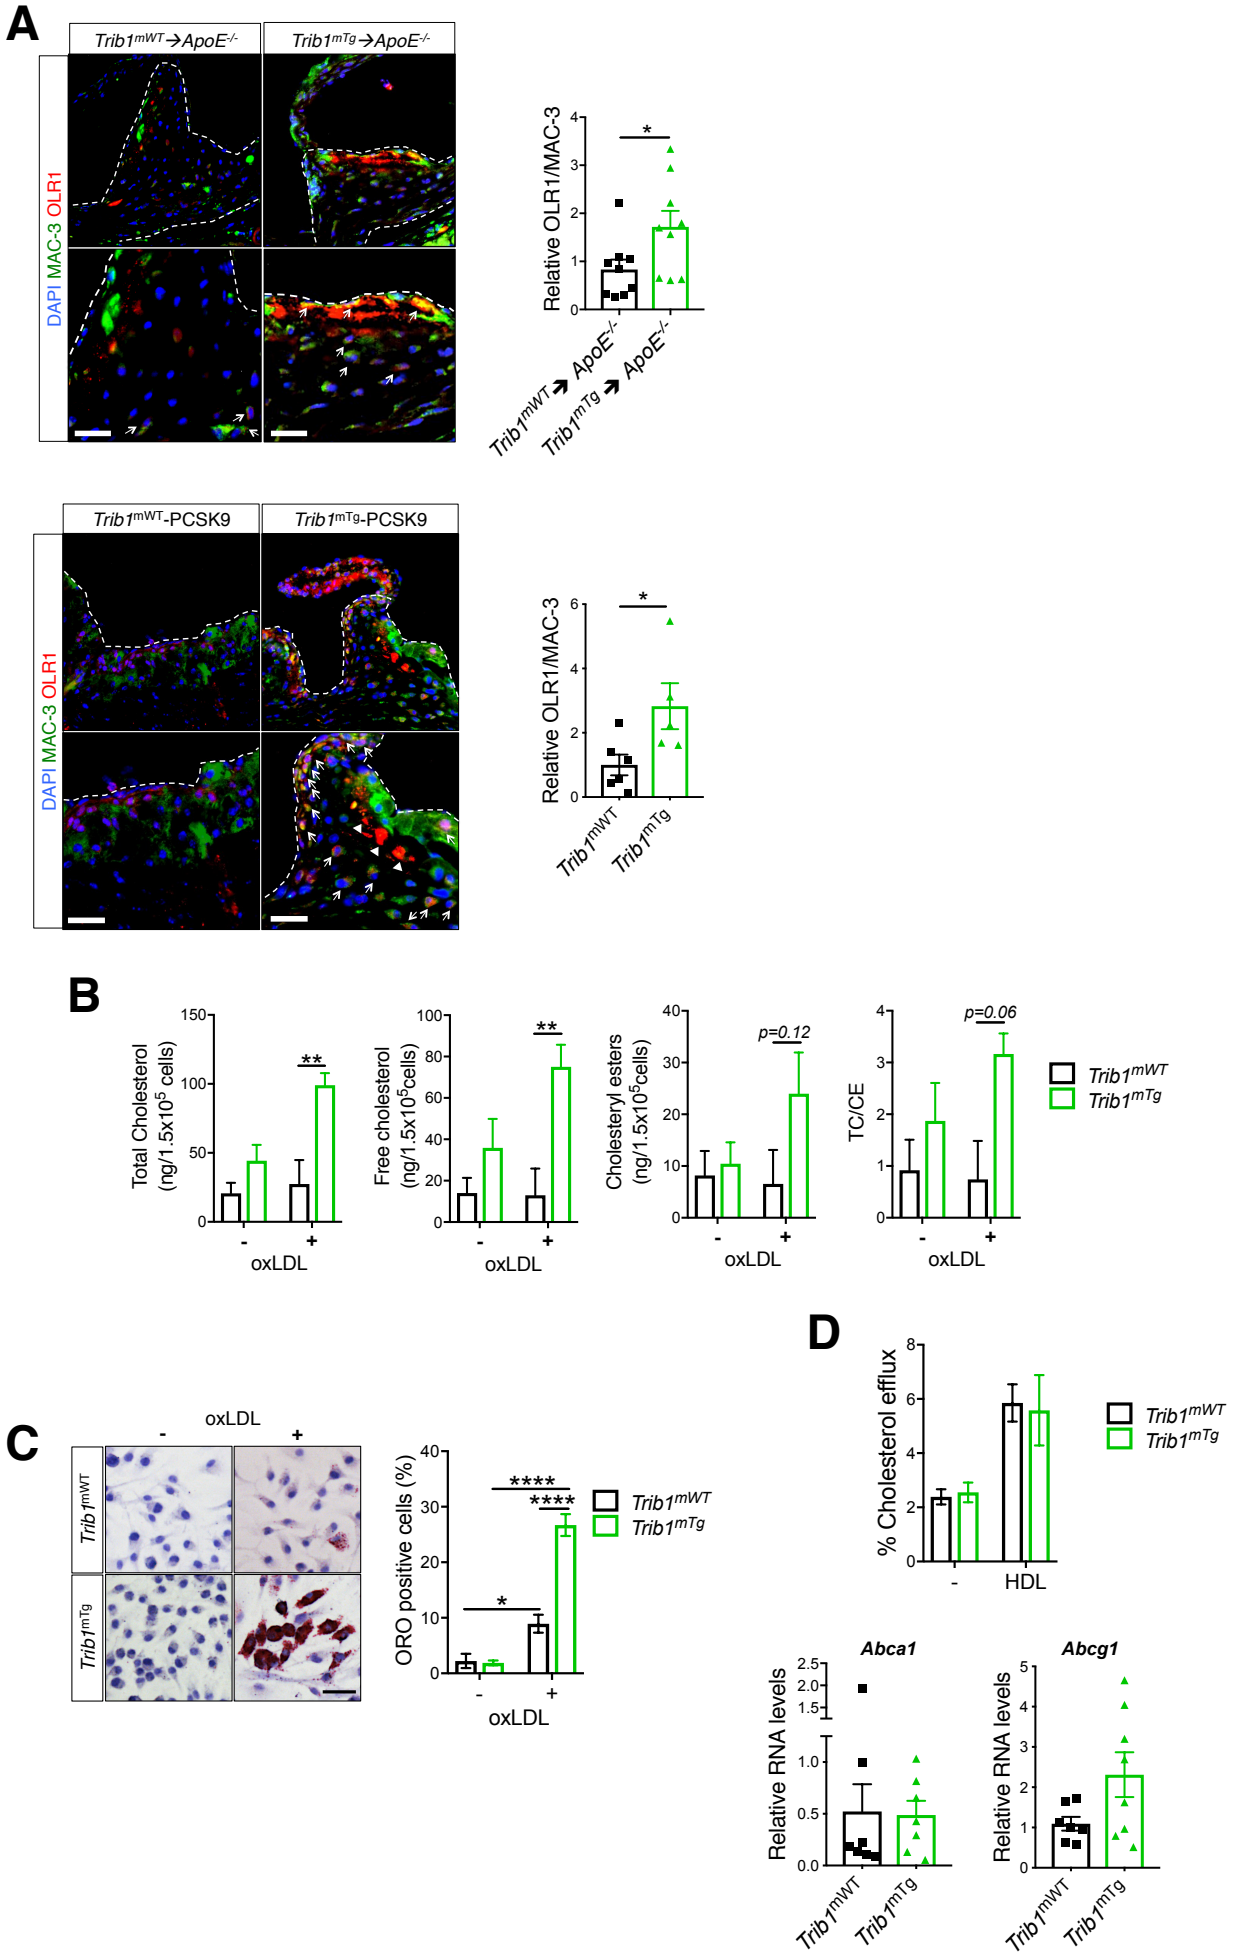



**Figure 6**

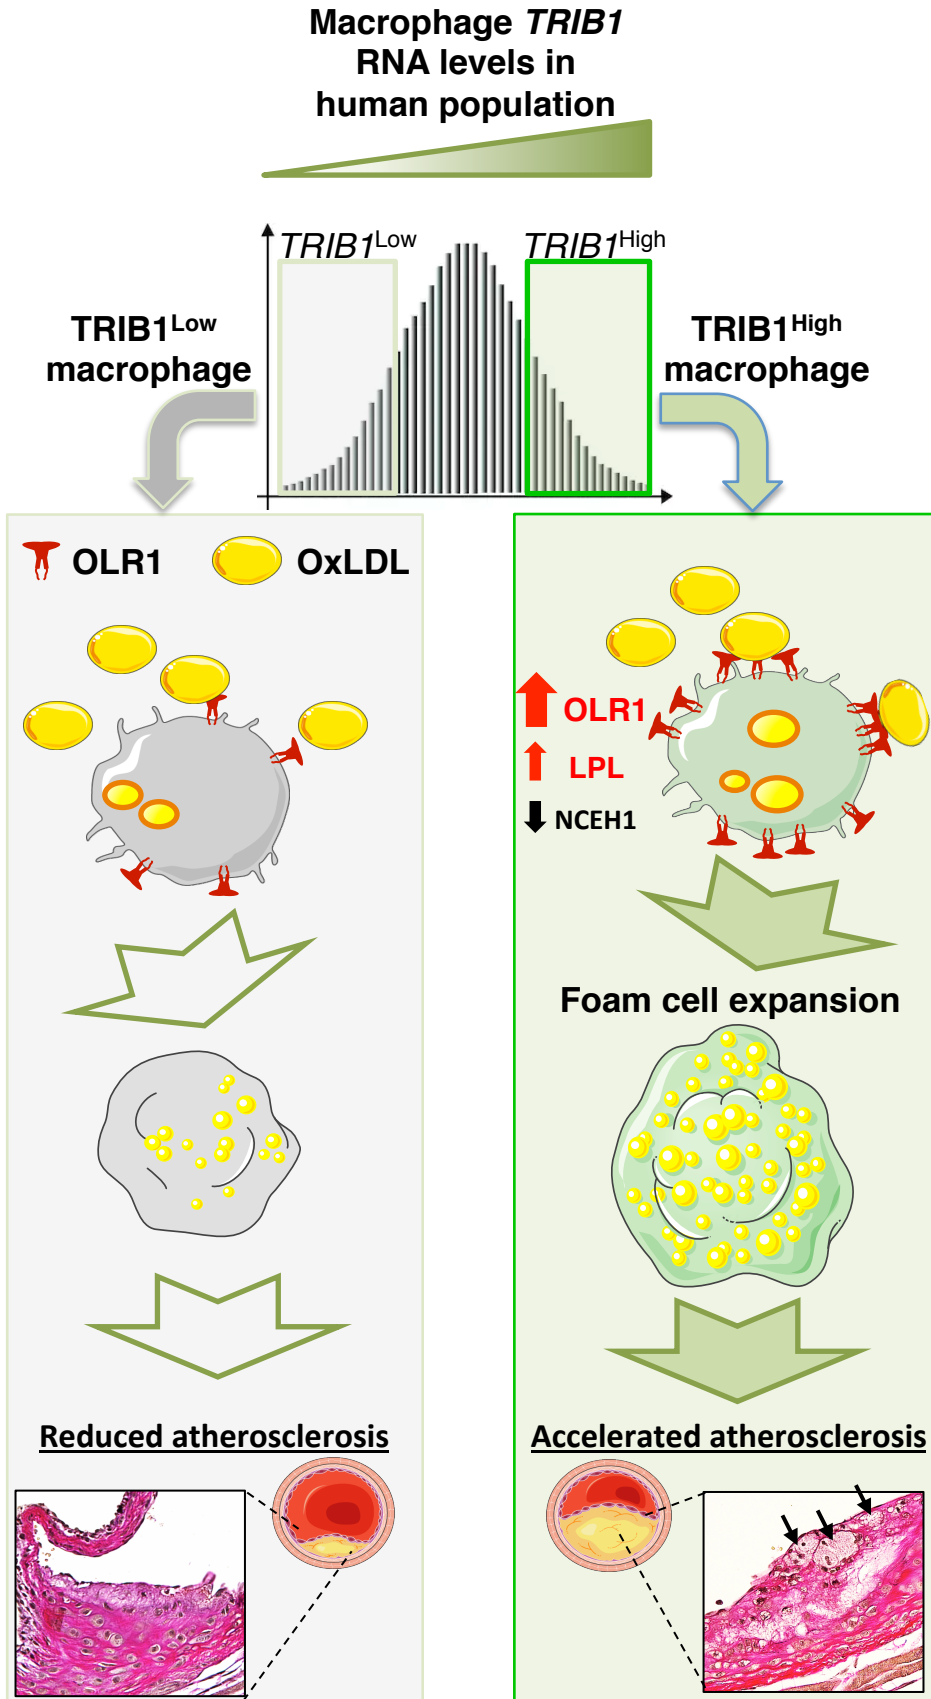

Source: https://www.biorxiv.org/content/10.1101/615872v1.full.pdf
